# Supplementary material for: The cascade radical cyclisation approach to prenylated alkaloids: synthesis of stephacidin A and notoamide B
Source: Royal Society of Chemistry journal article supplement (doi:10.1039/c3ob40979a), 2013-01-01

# **The Cascade Radical Cyclisation Approach to Prenylated Alkaloids: Synthesis of Stephacidin A and Notoamide B**

Nigel S. Simpkins,\* Ilias Pavlakos, Michael D. Weller, and Louise Male

School of Chemistry, University of Birmingham, Edgbaston, Birmingham, B15 2TT, UK

E-mail: [n.simpkins@bham.ac.uk](mailto:n.simpkins@bham.ac.uk)

Supplementary Information

NMR spectra of new compounds and the final natural product targets stephacidin A and notoamide B

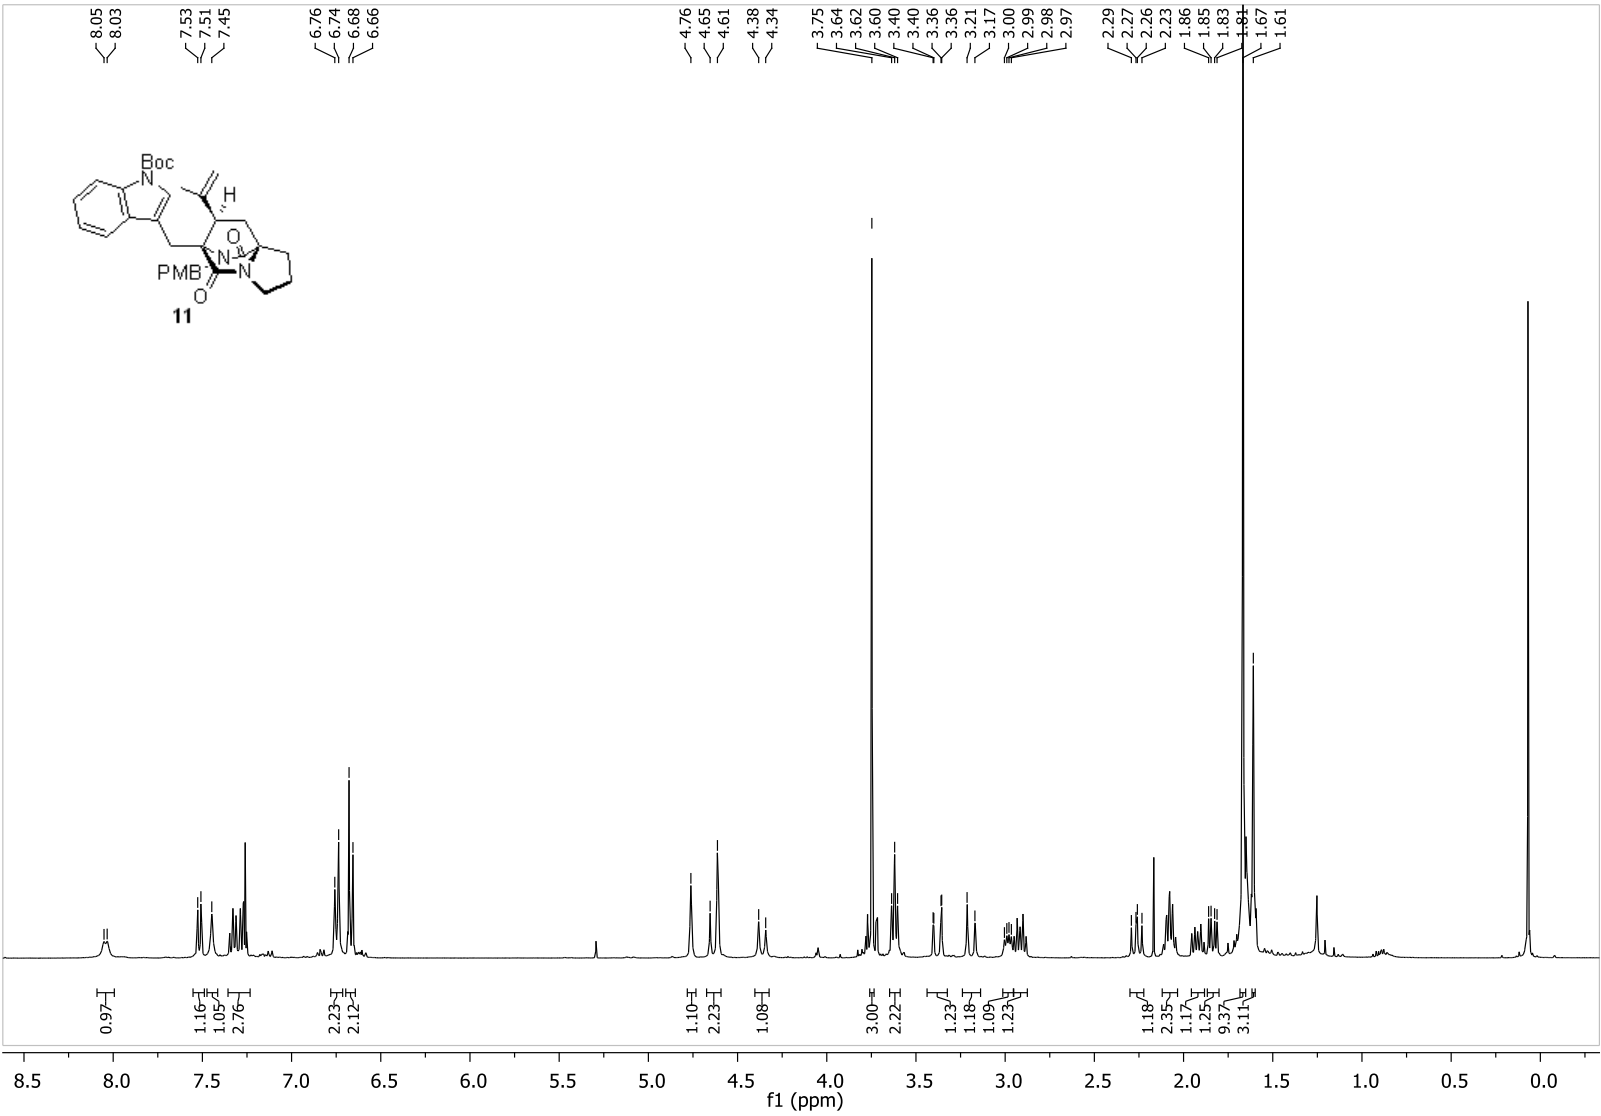

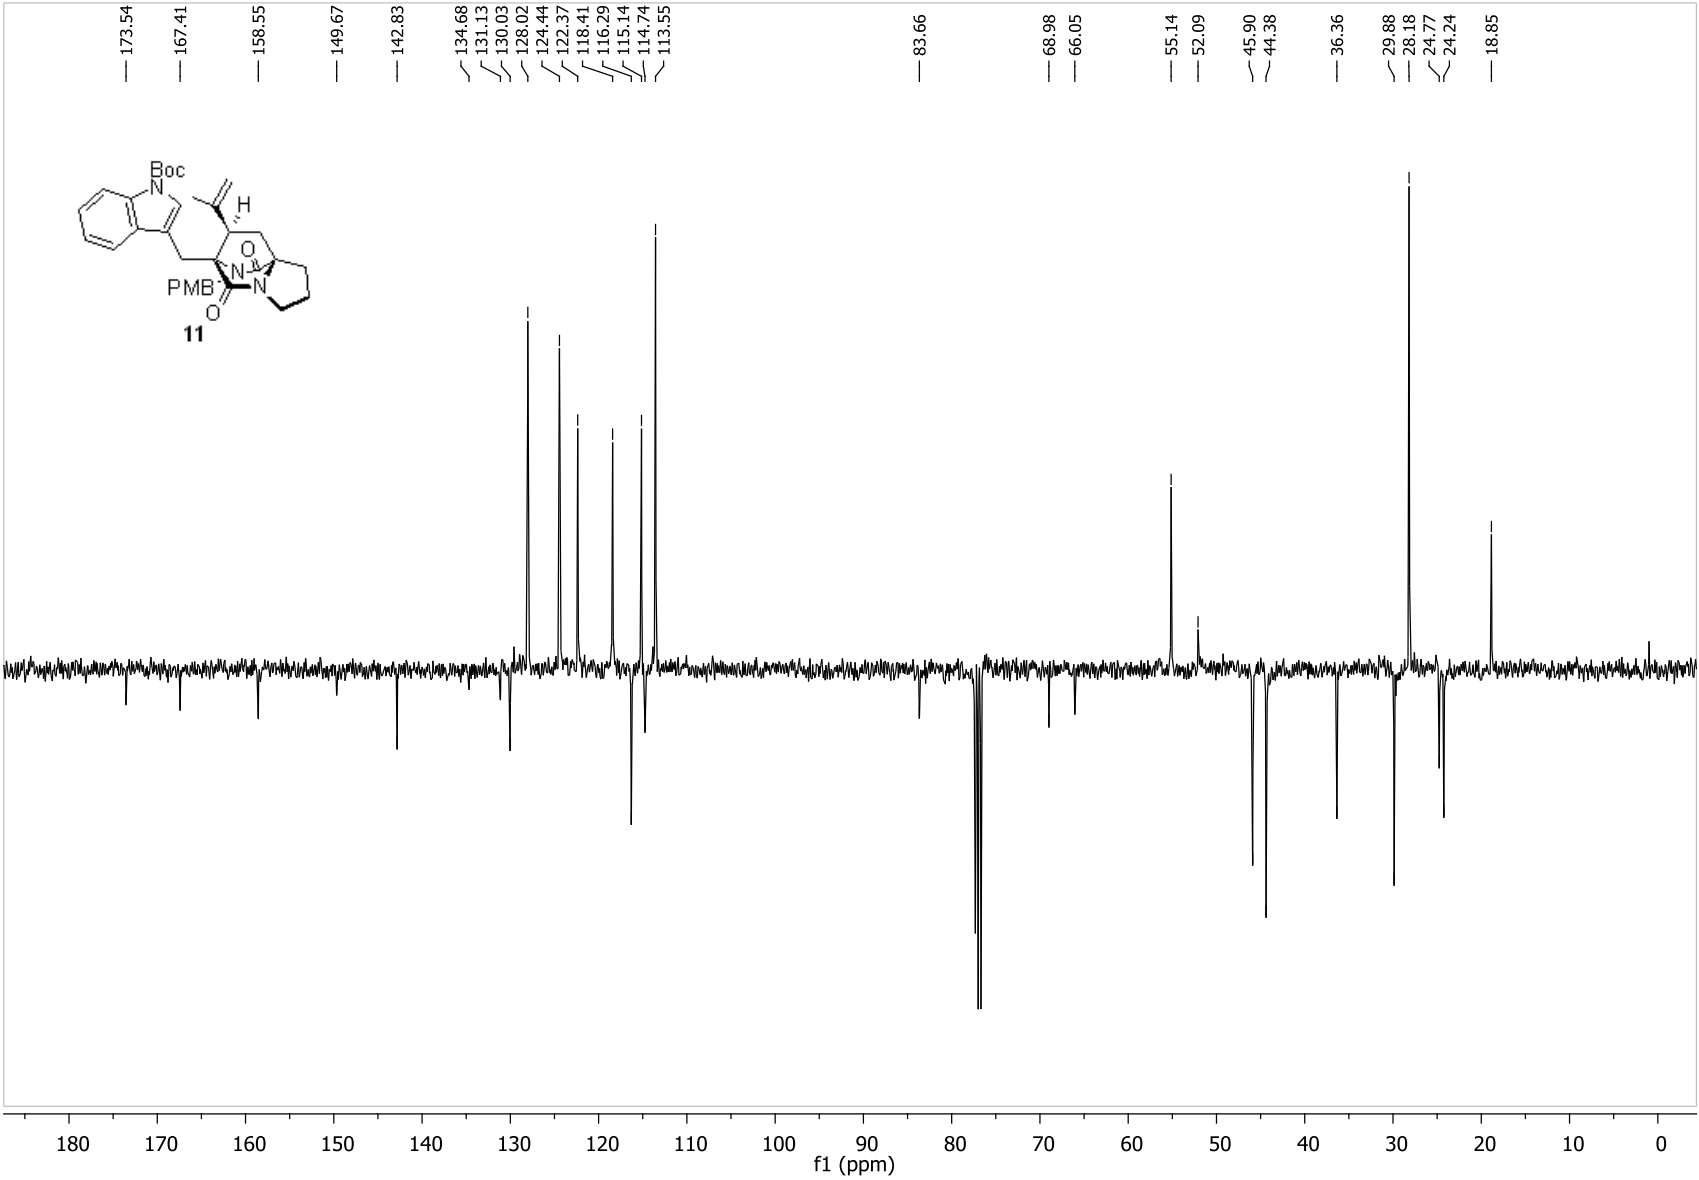

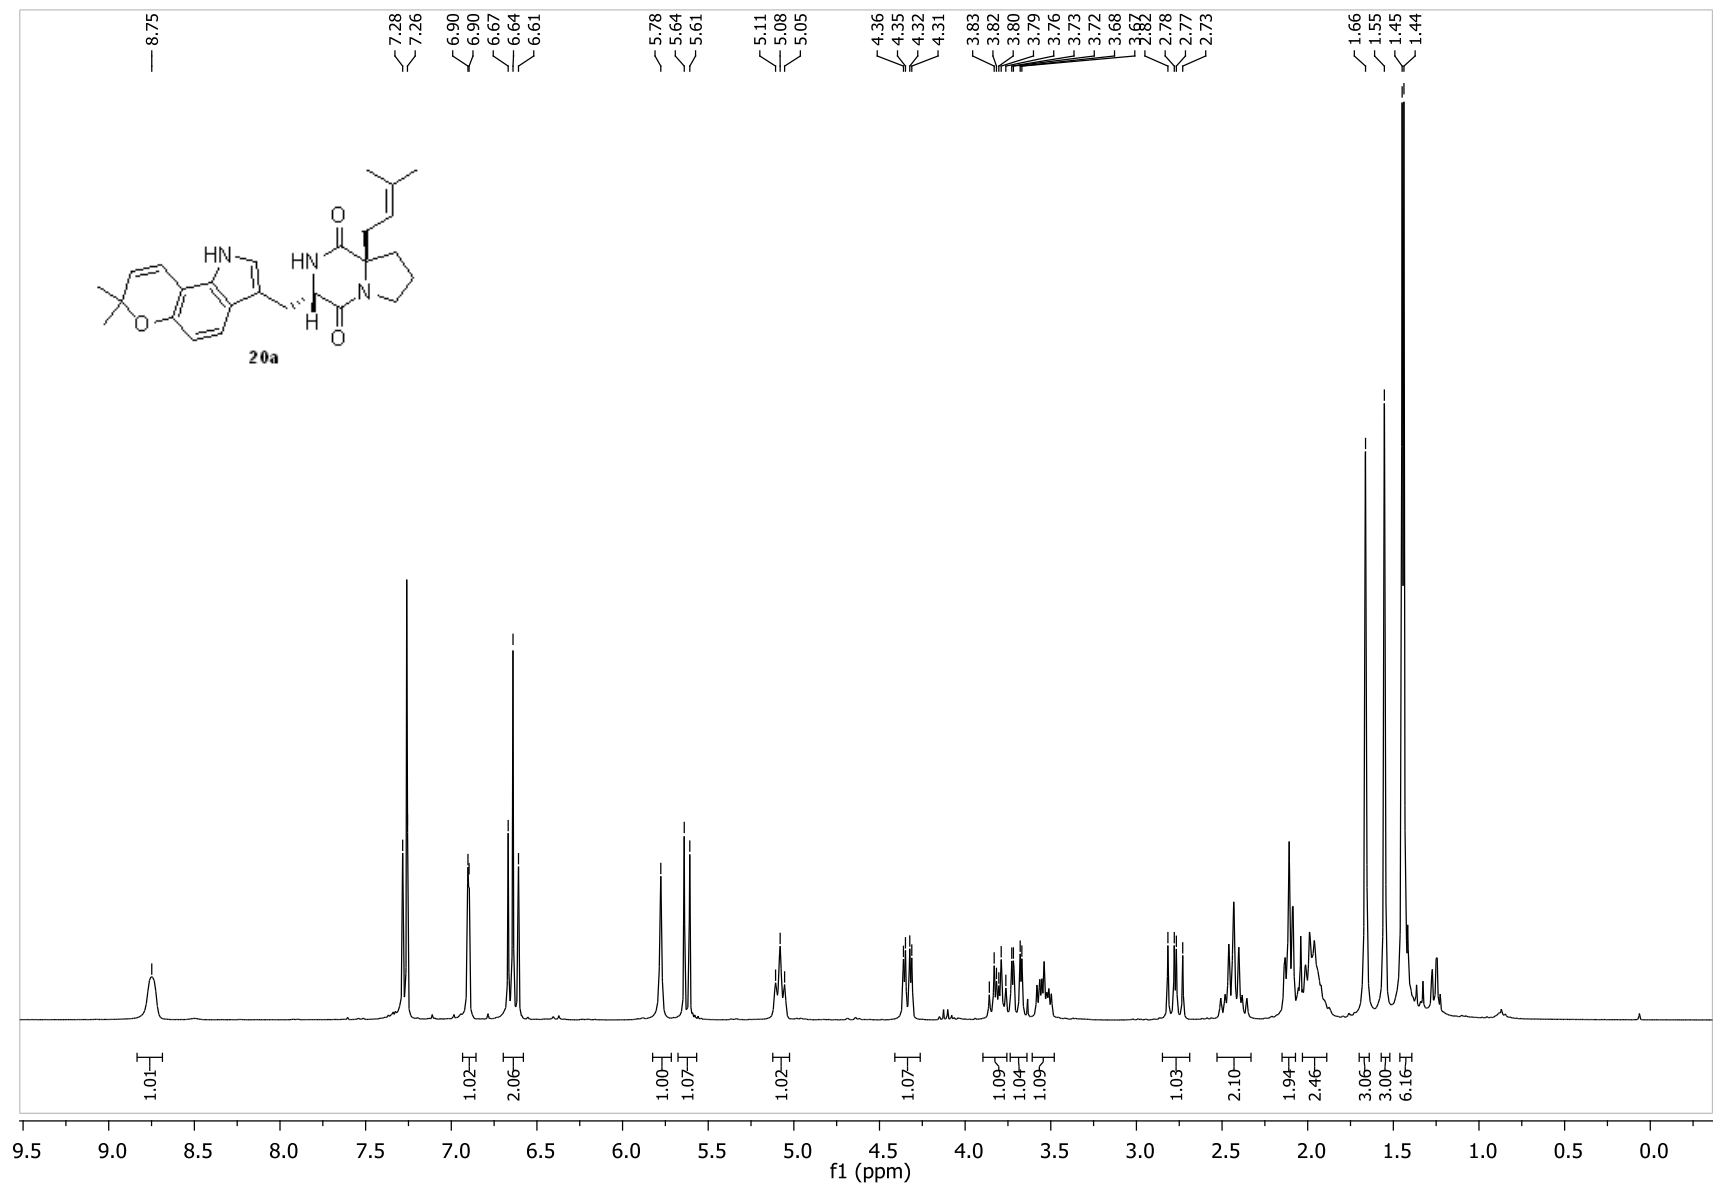

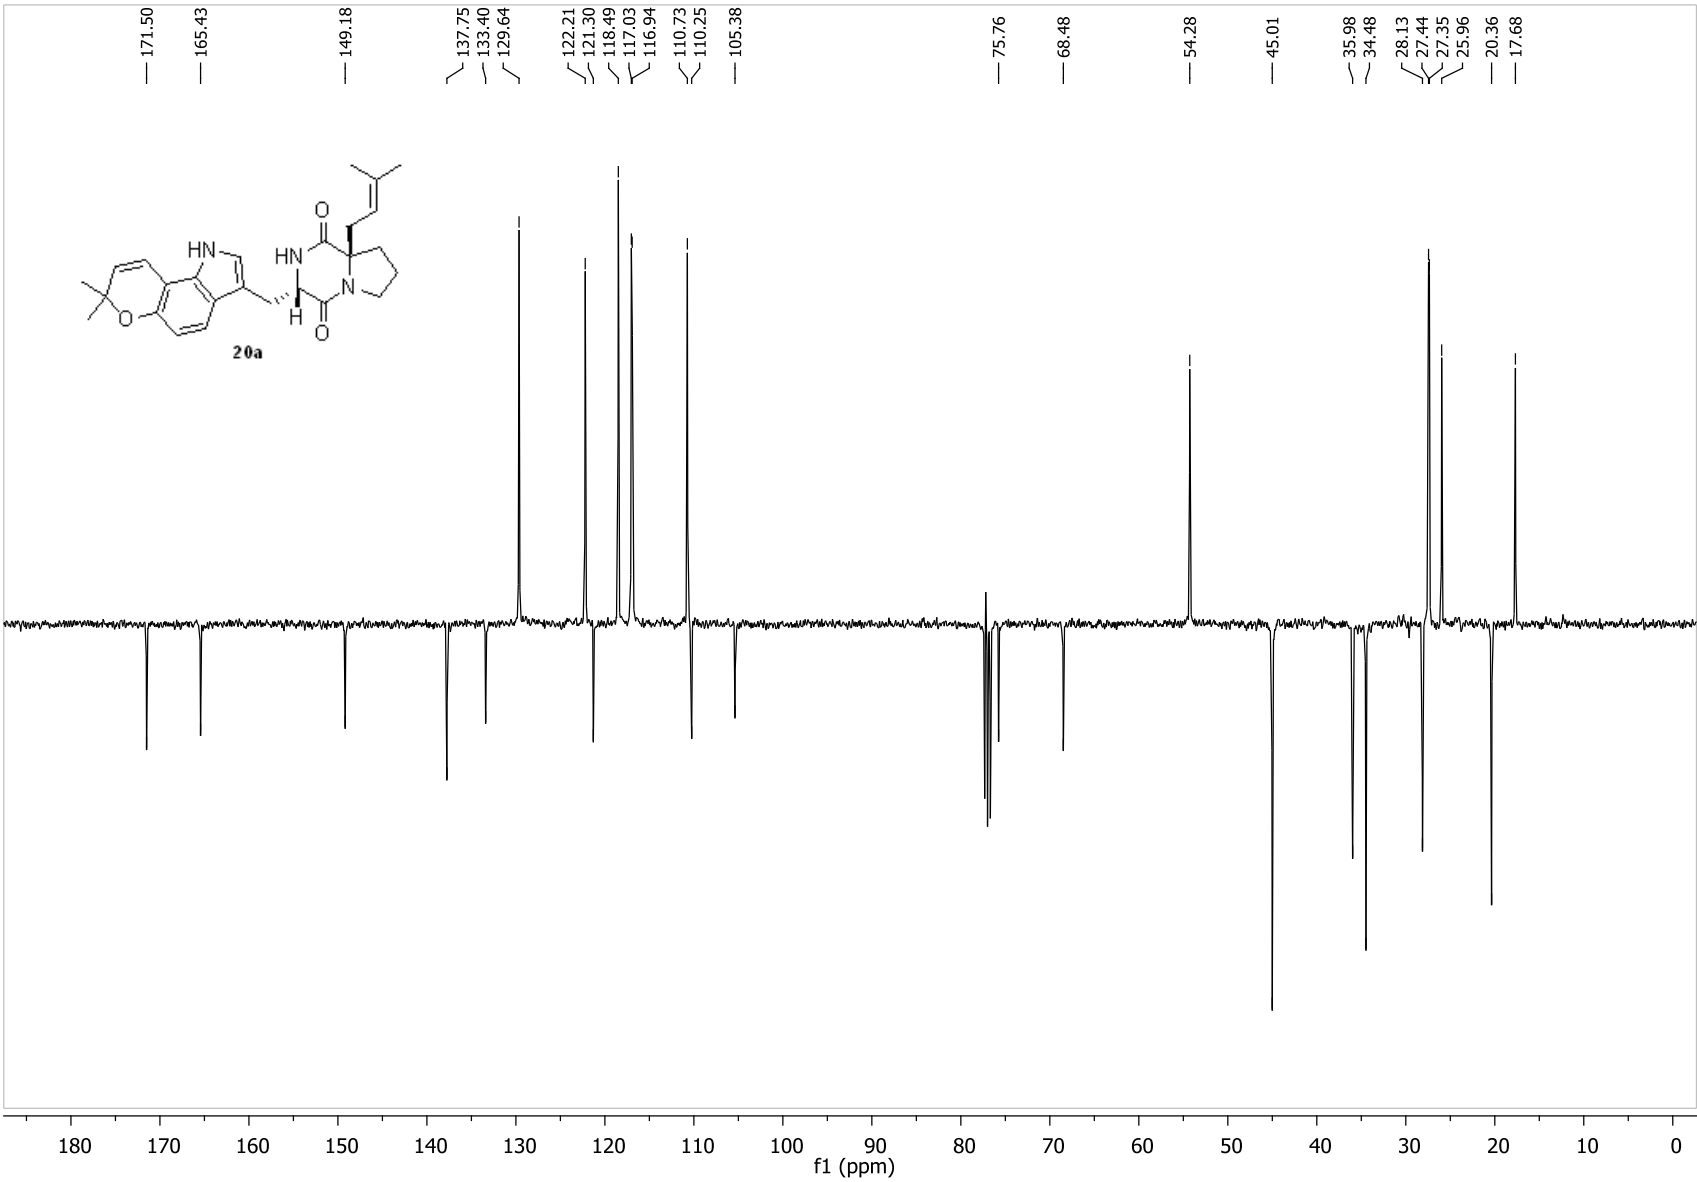

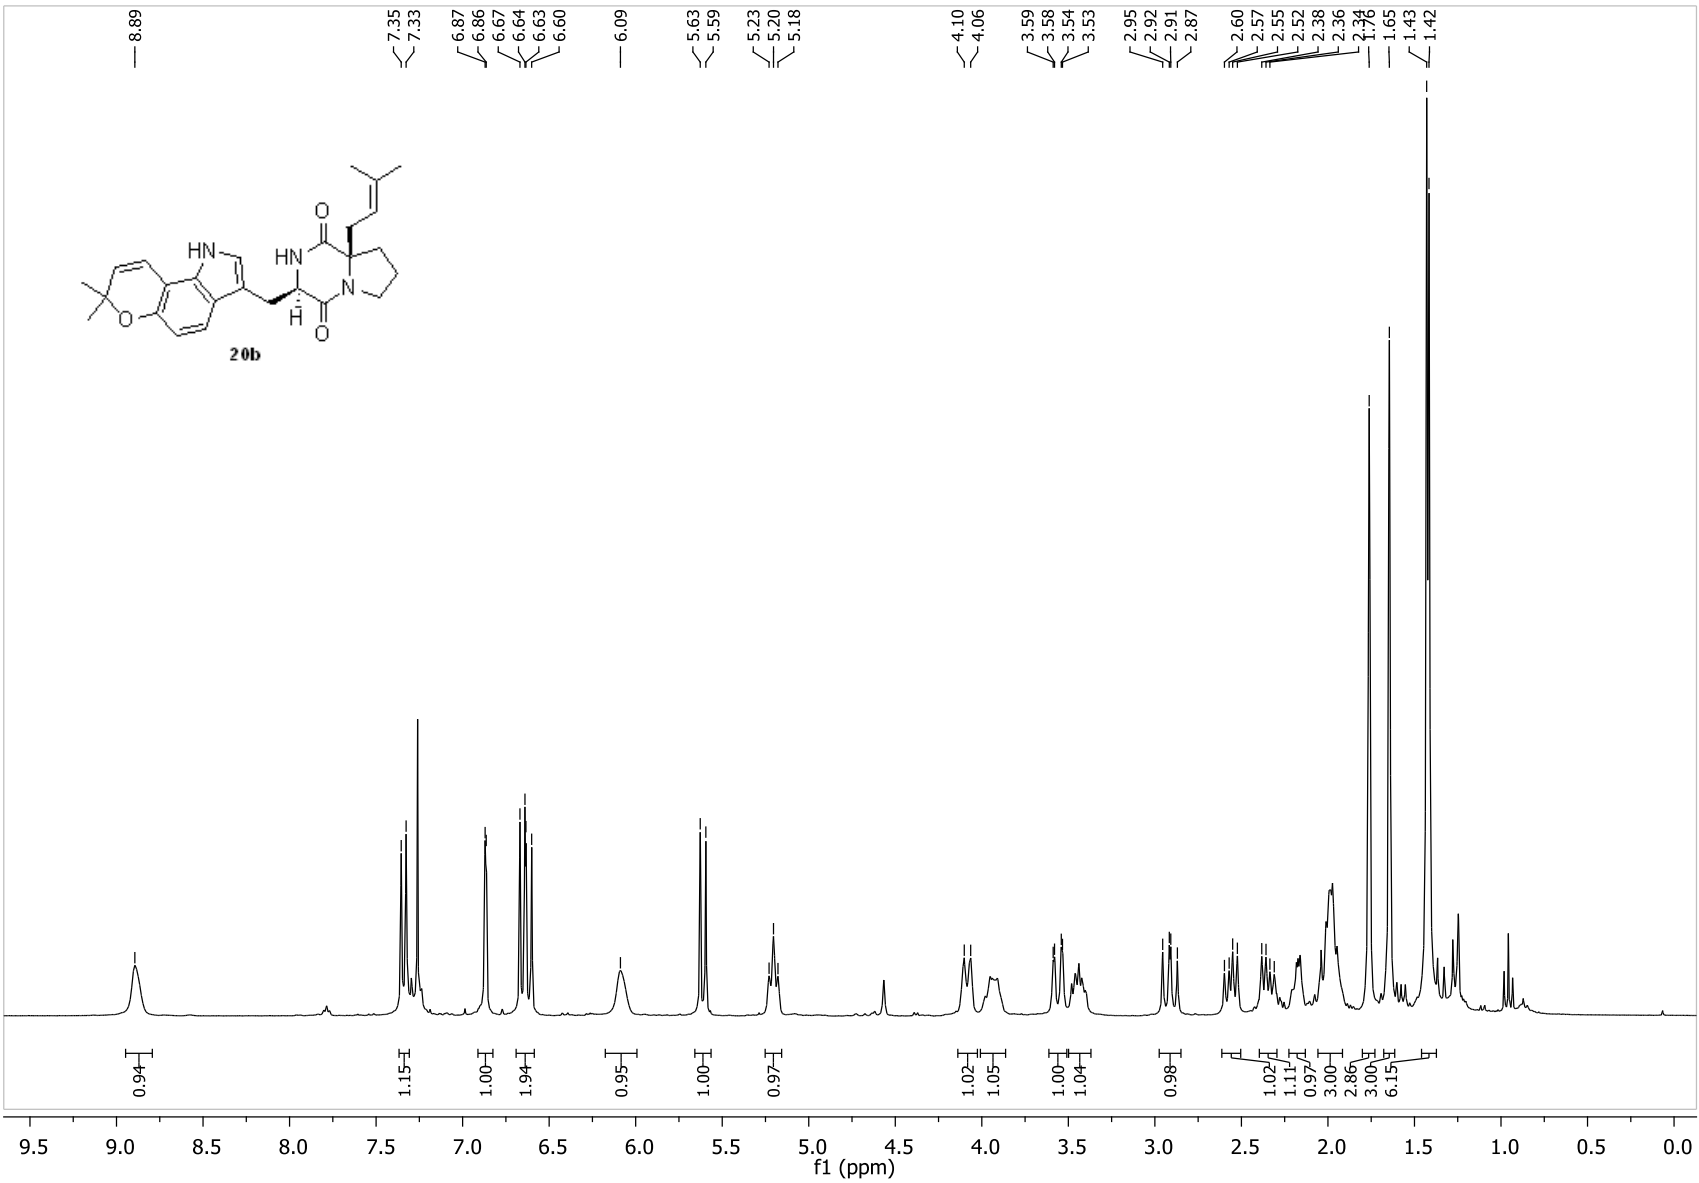

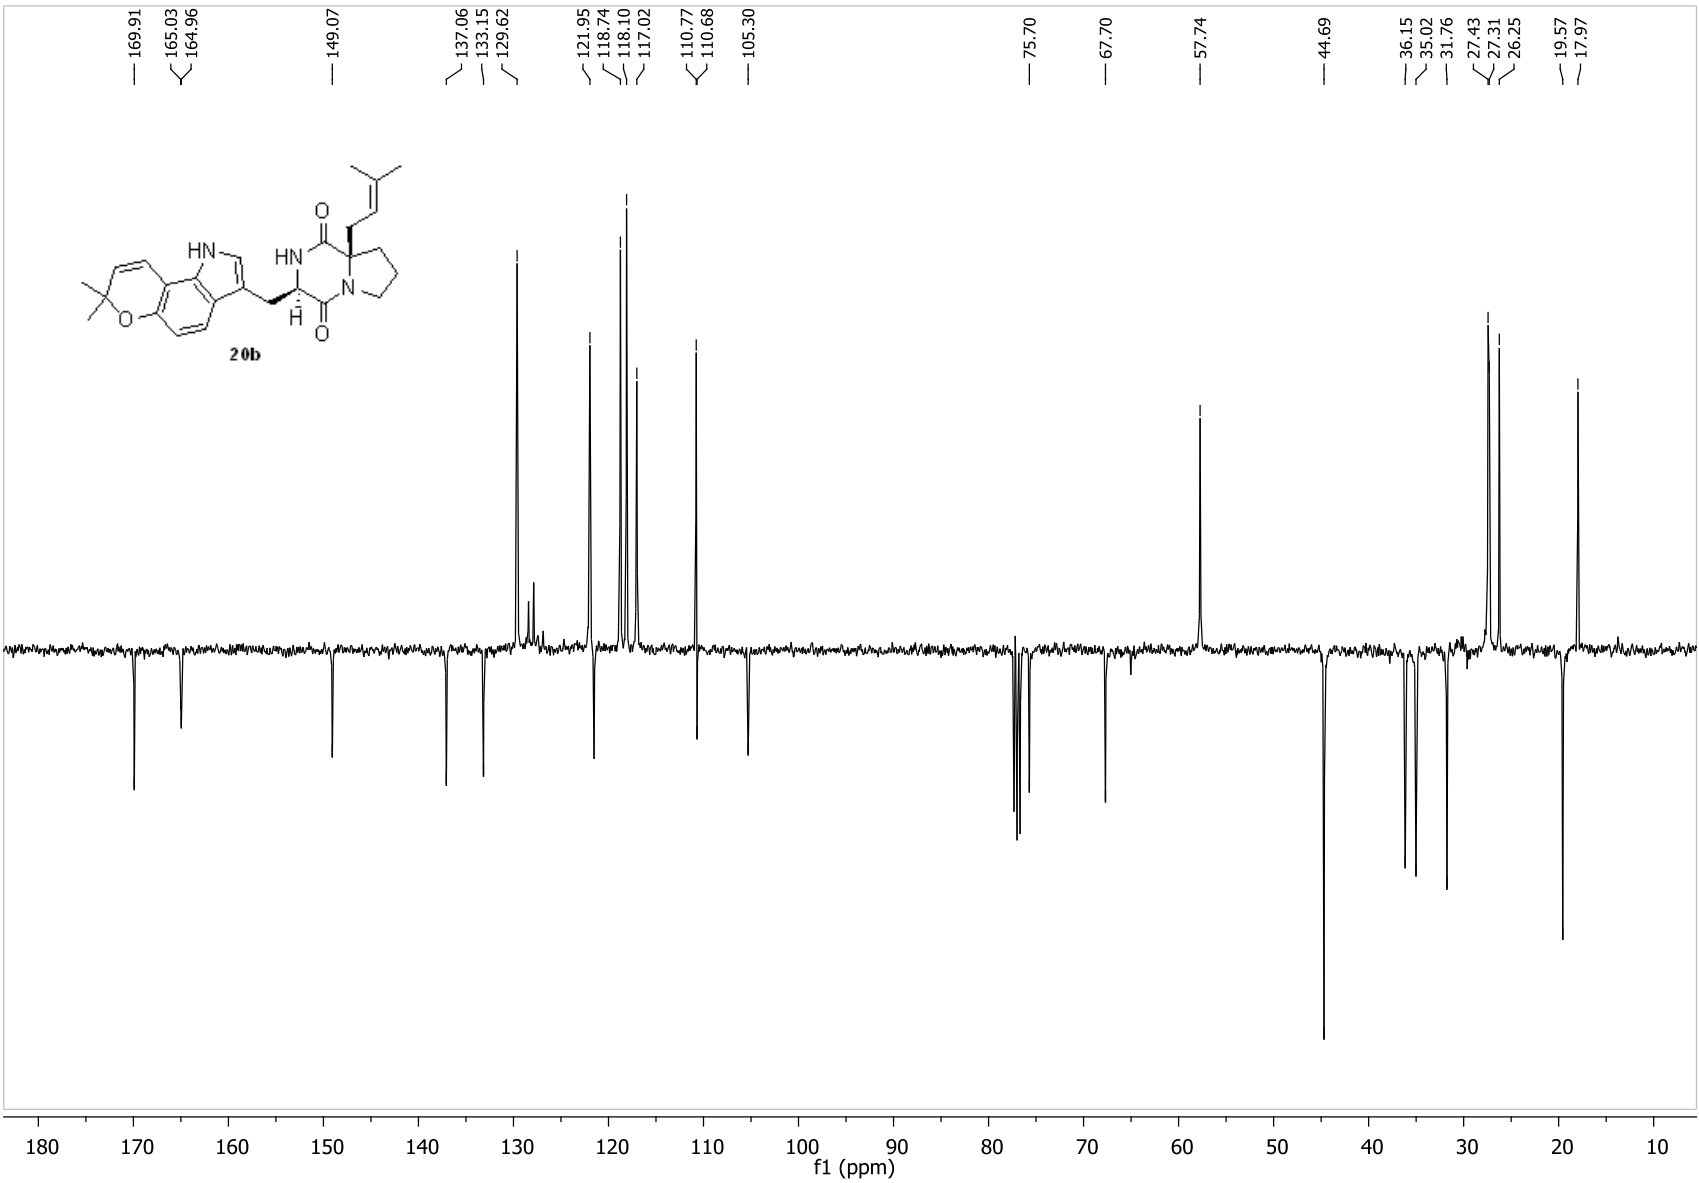

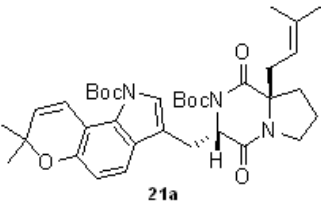



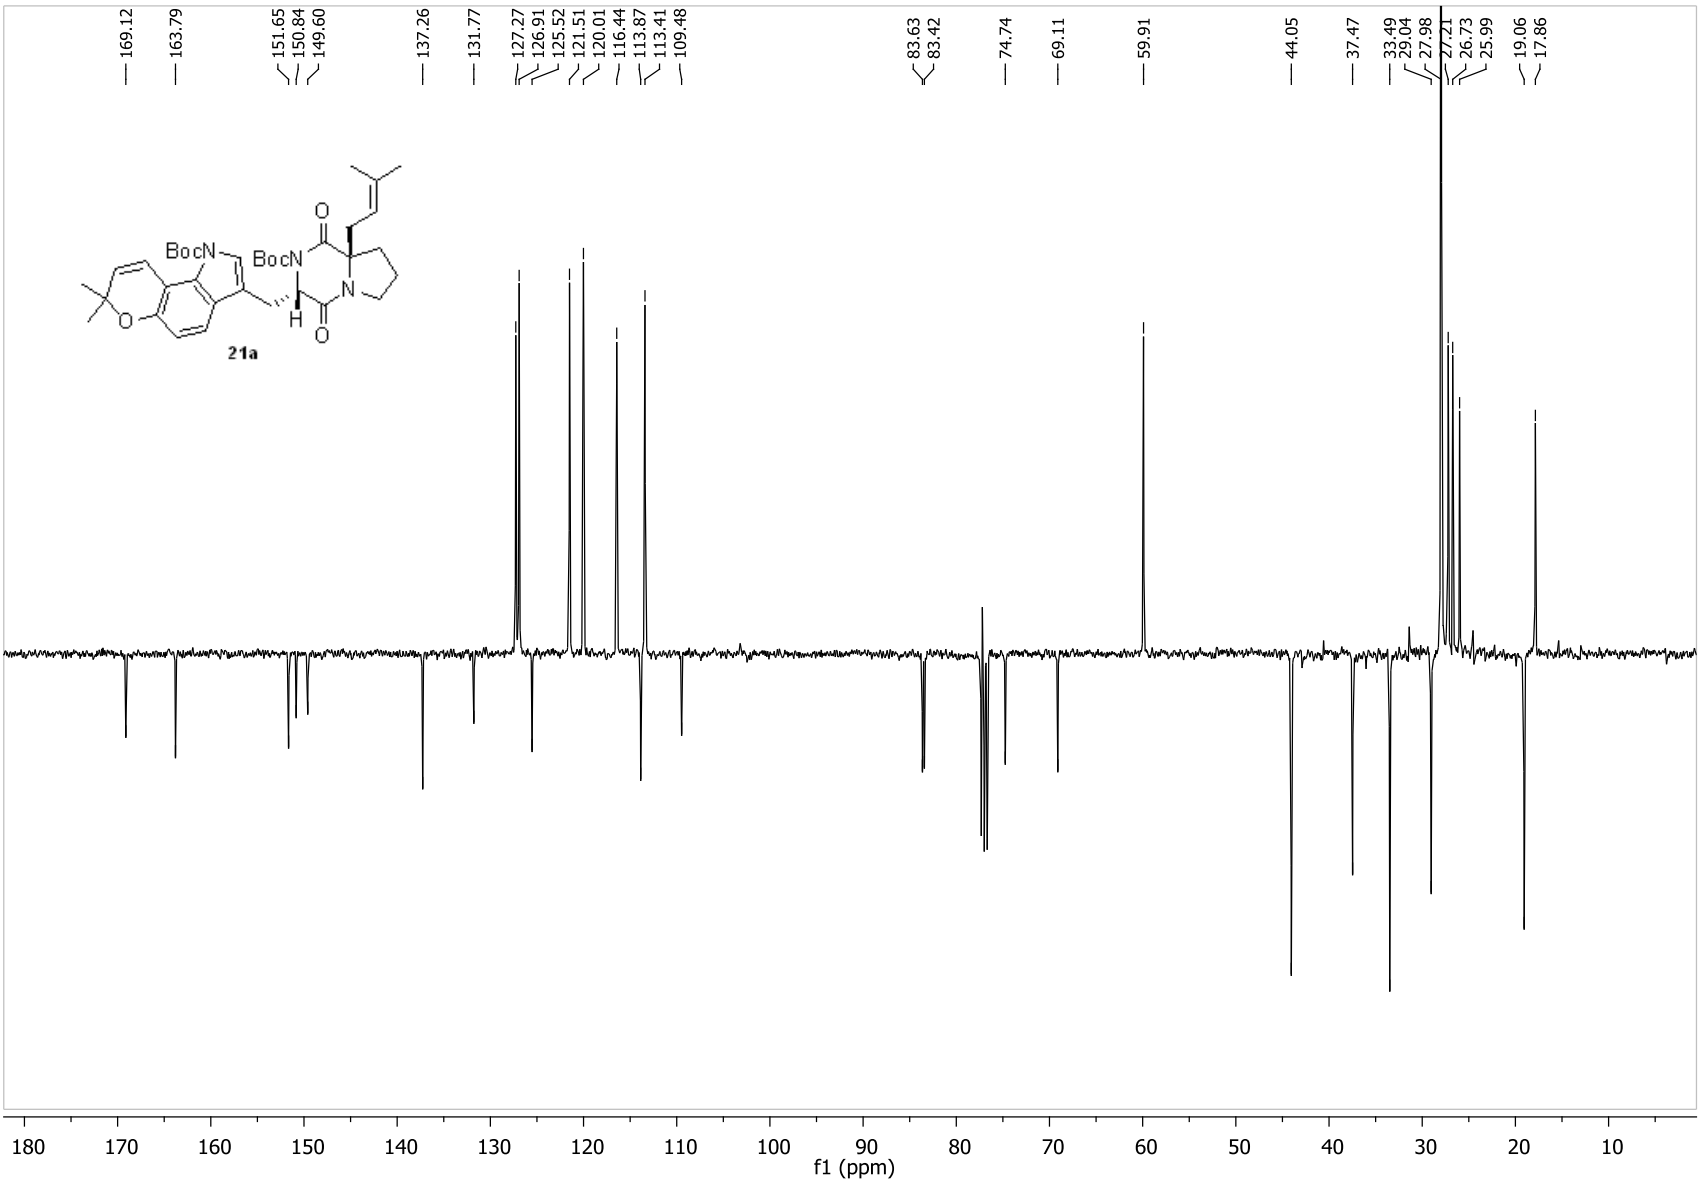

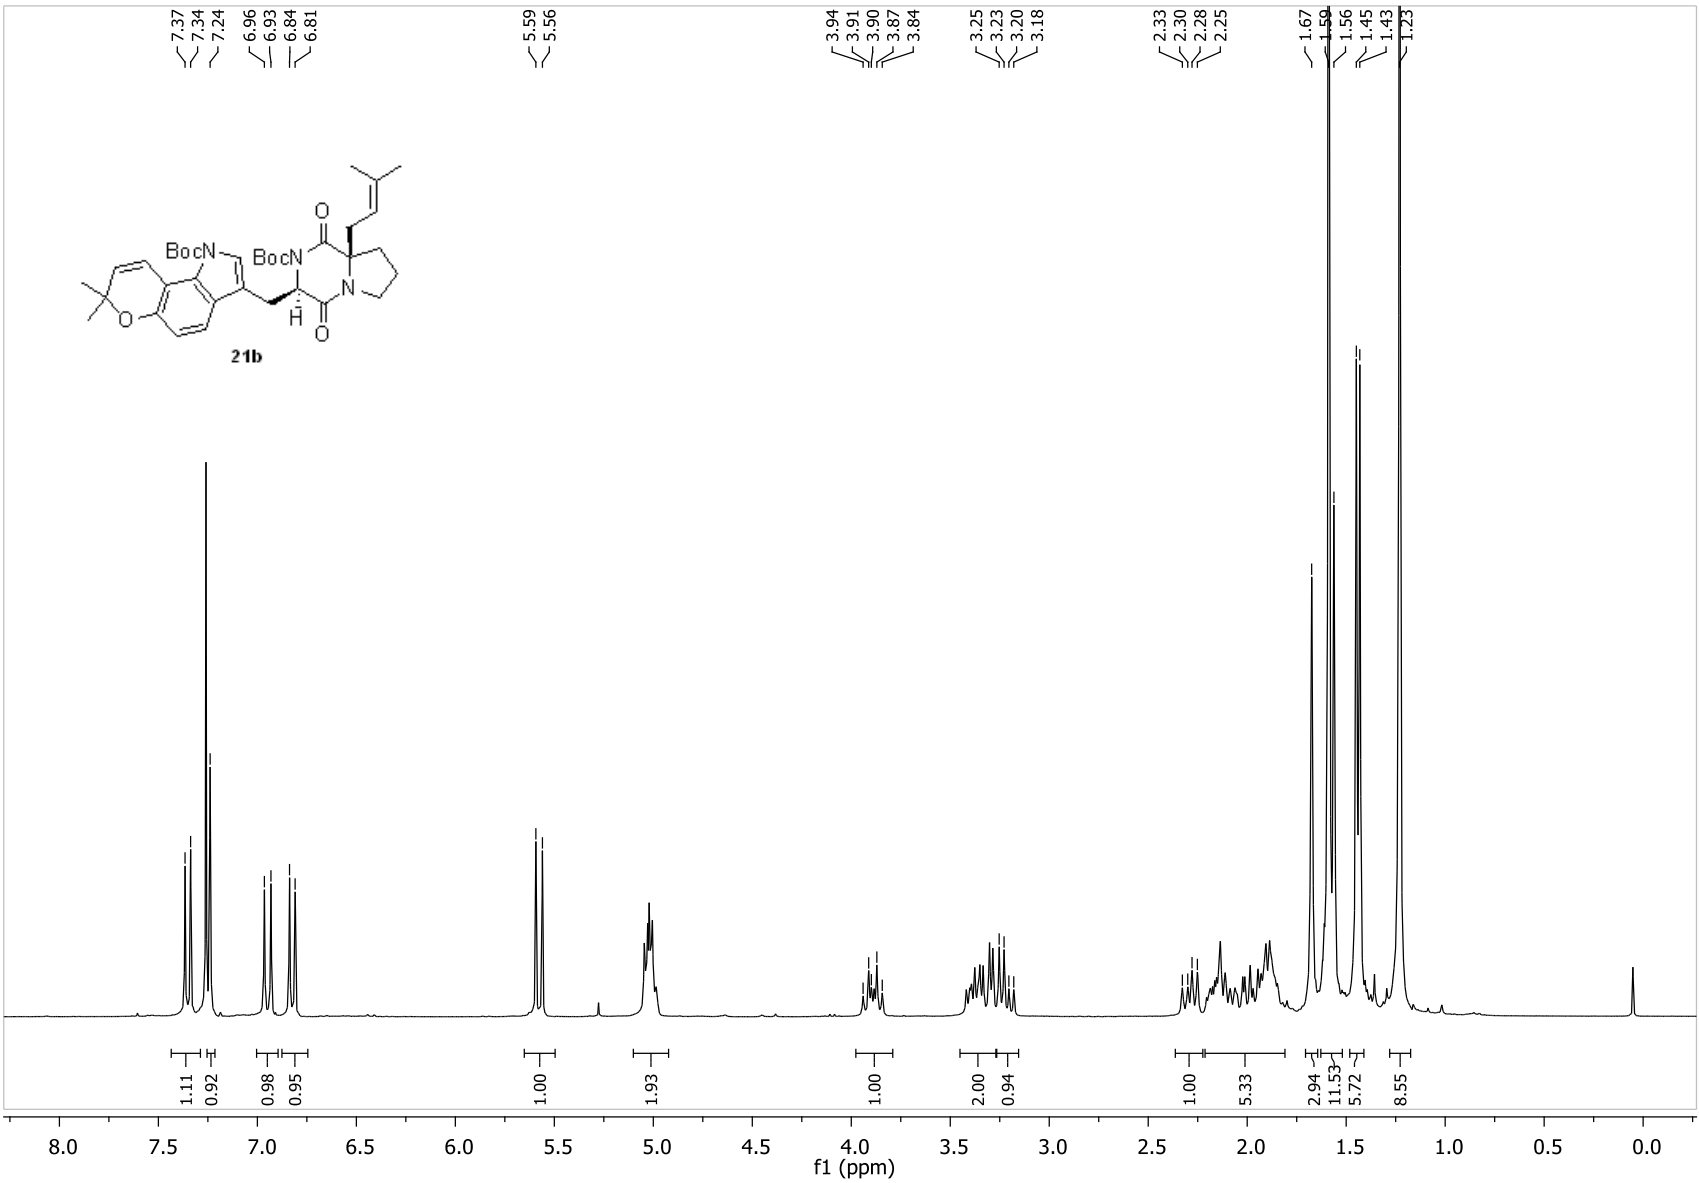

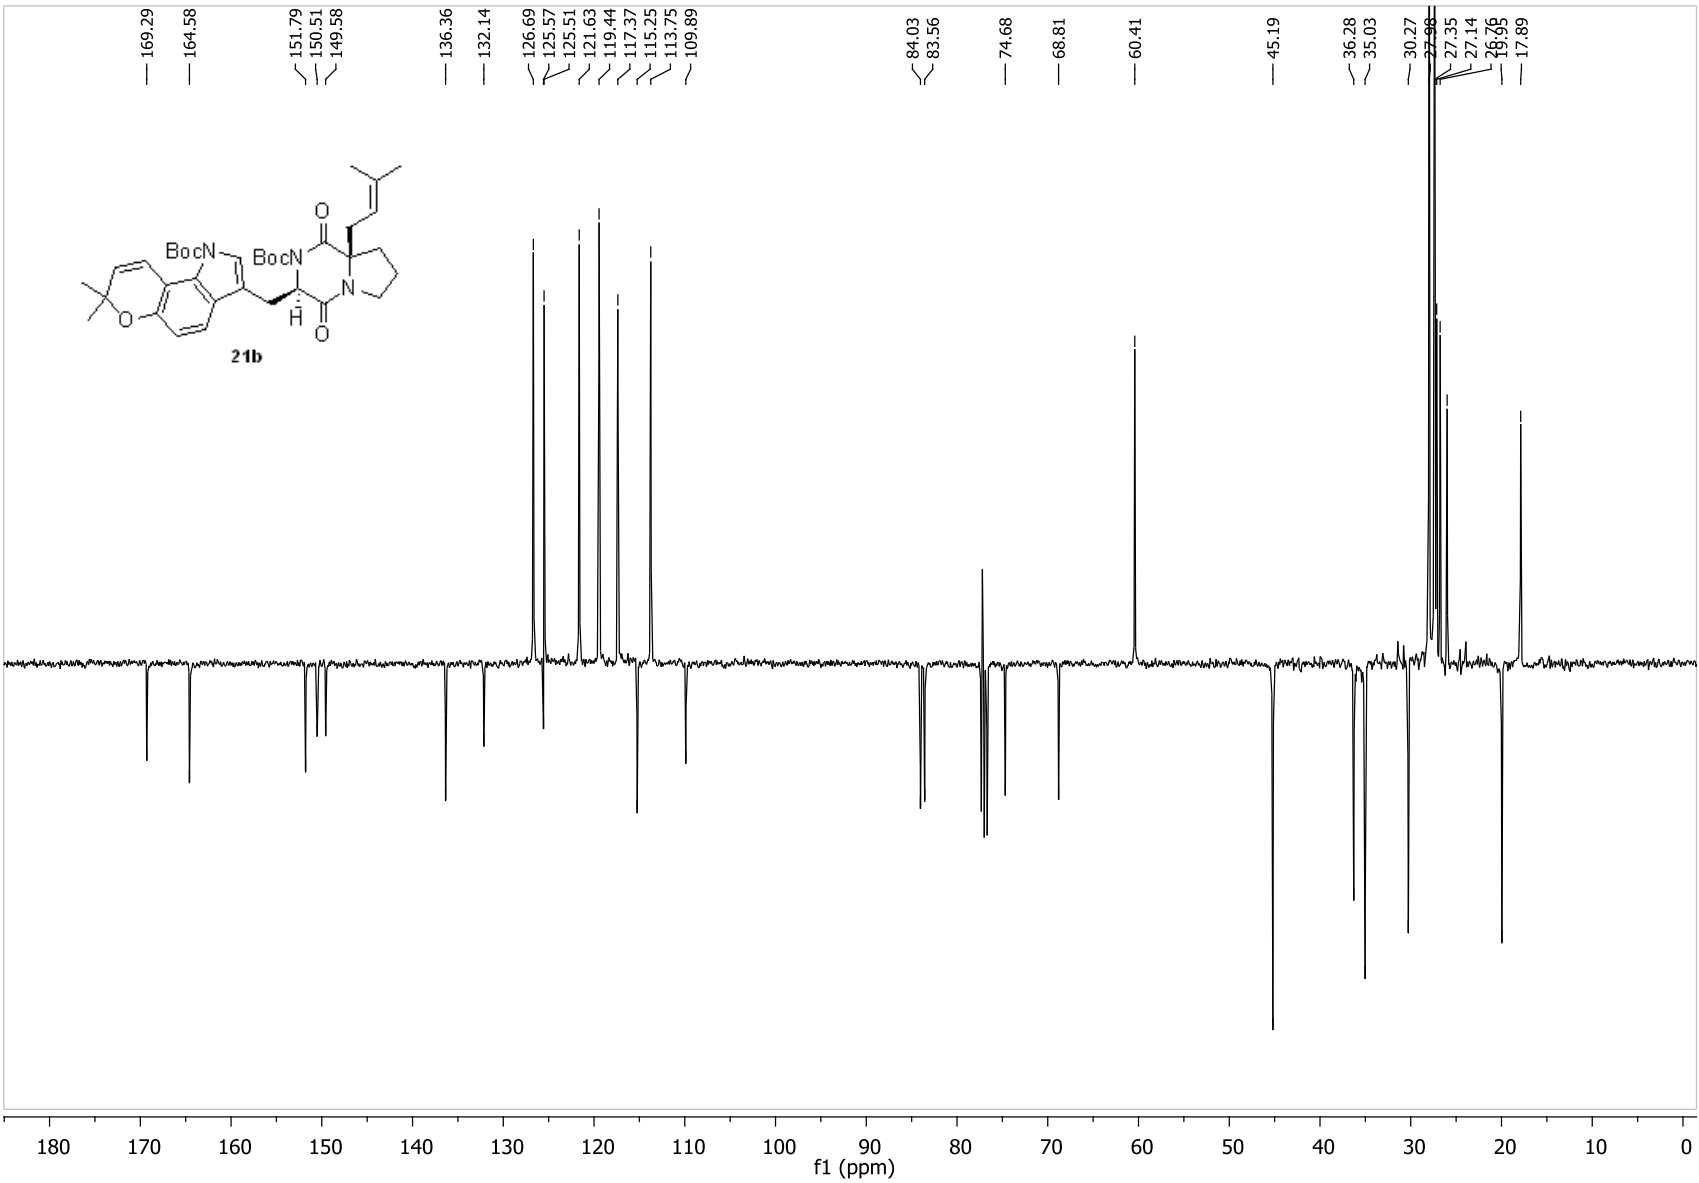

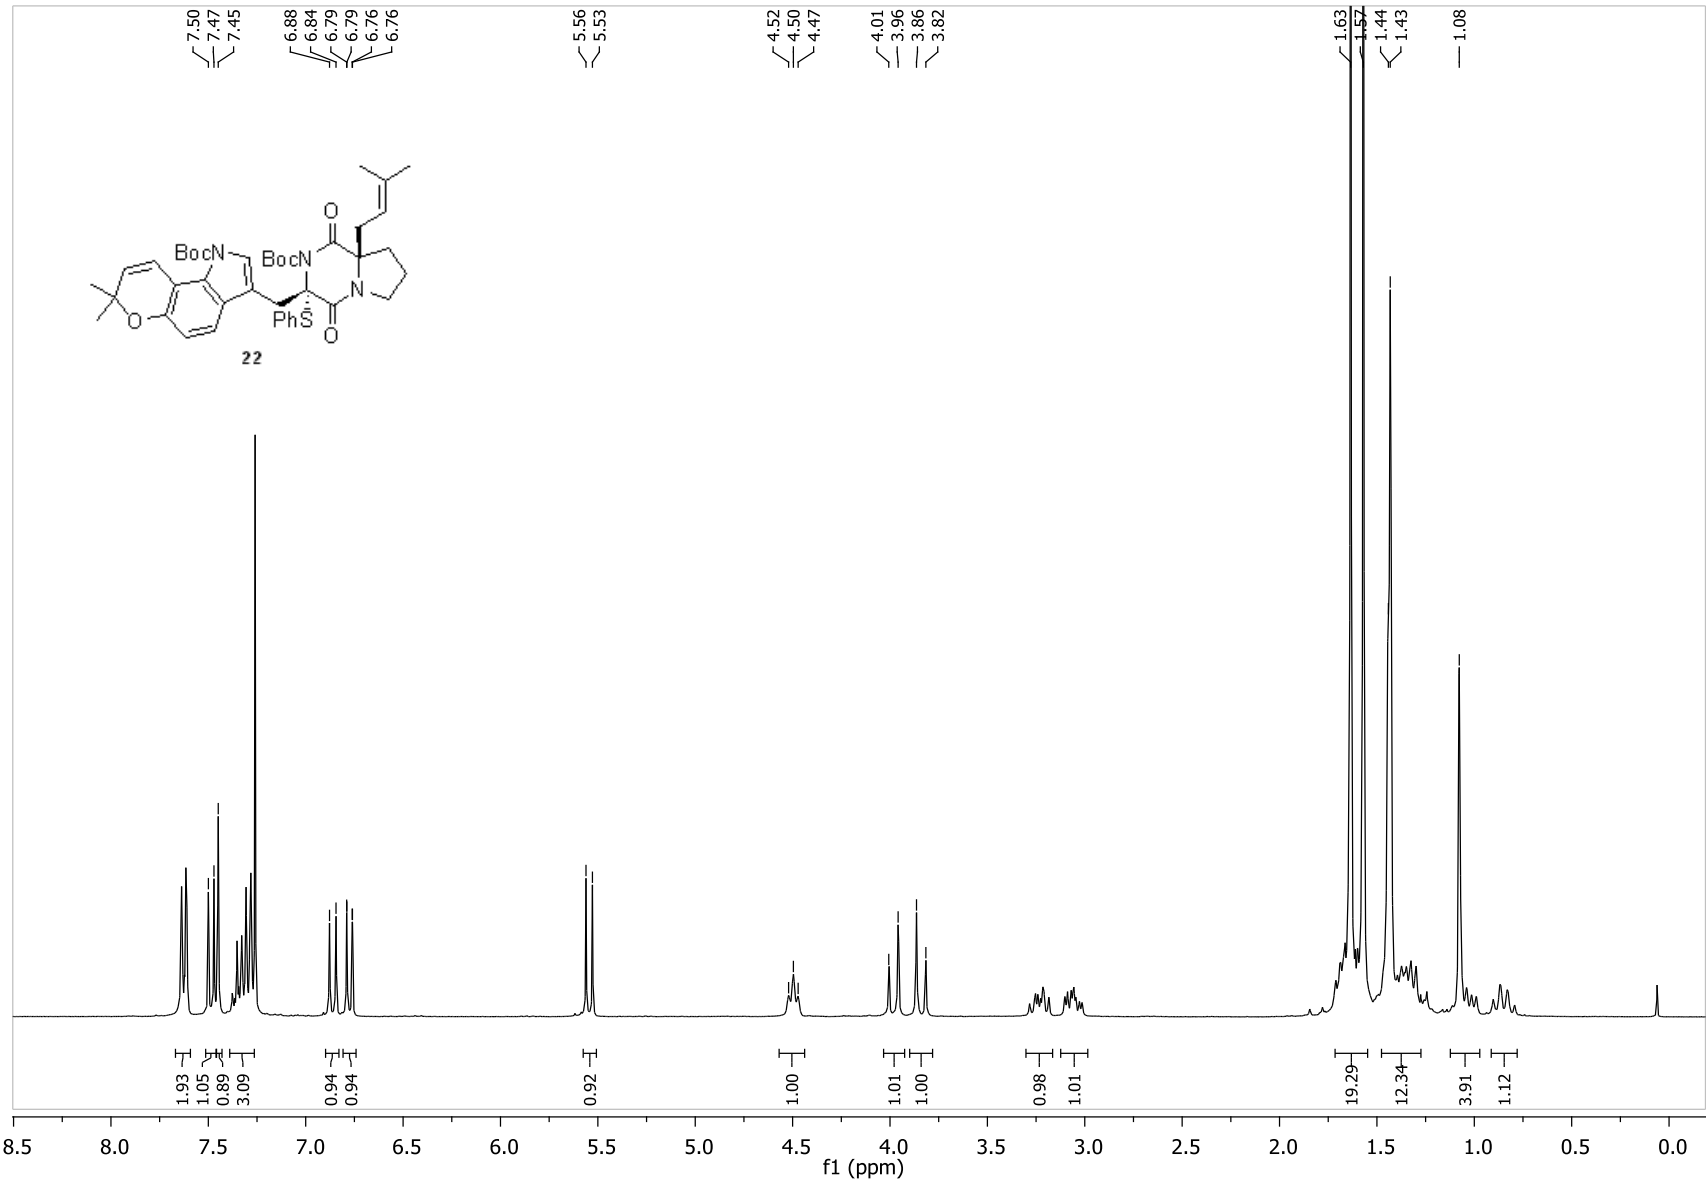

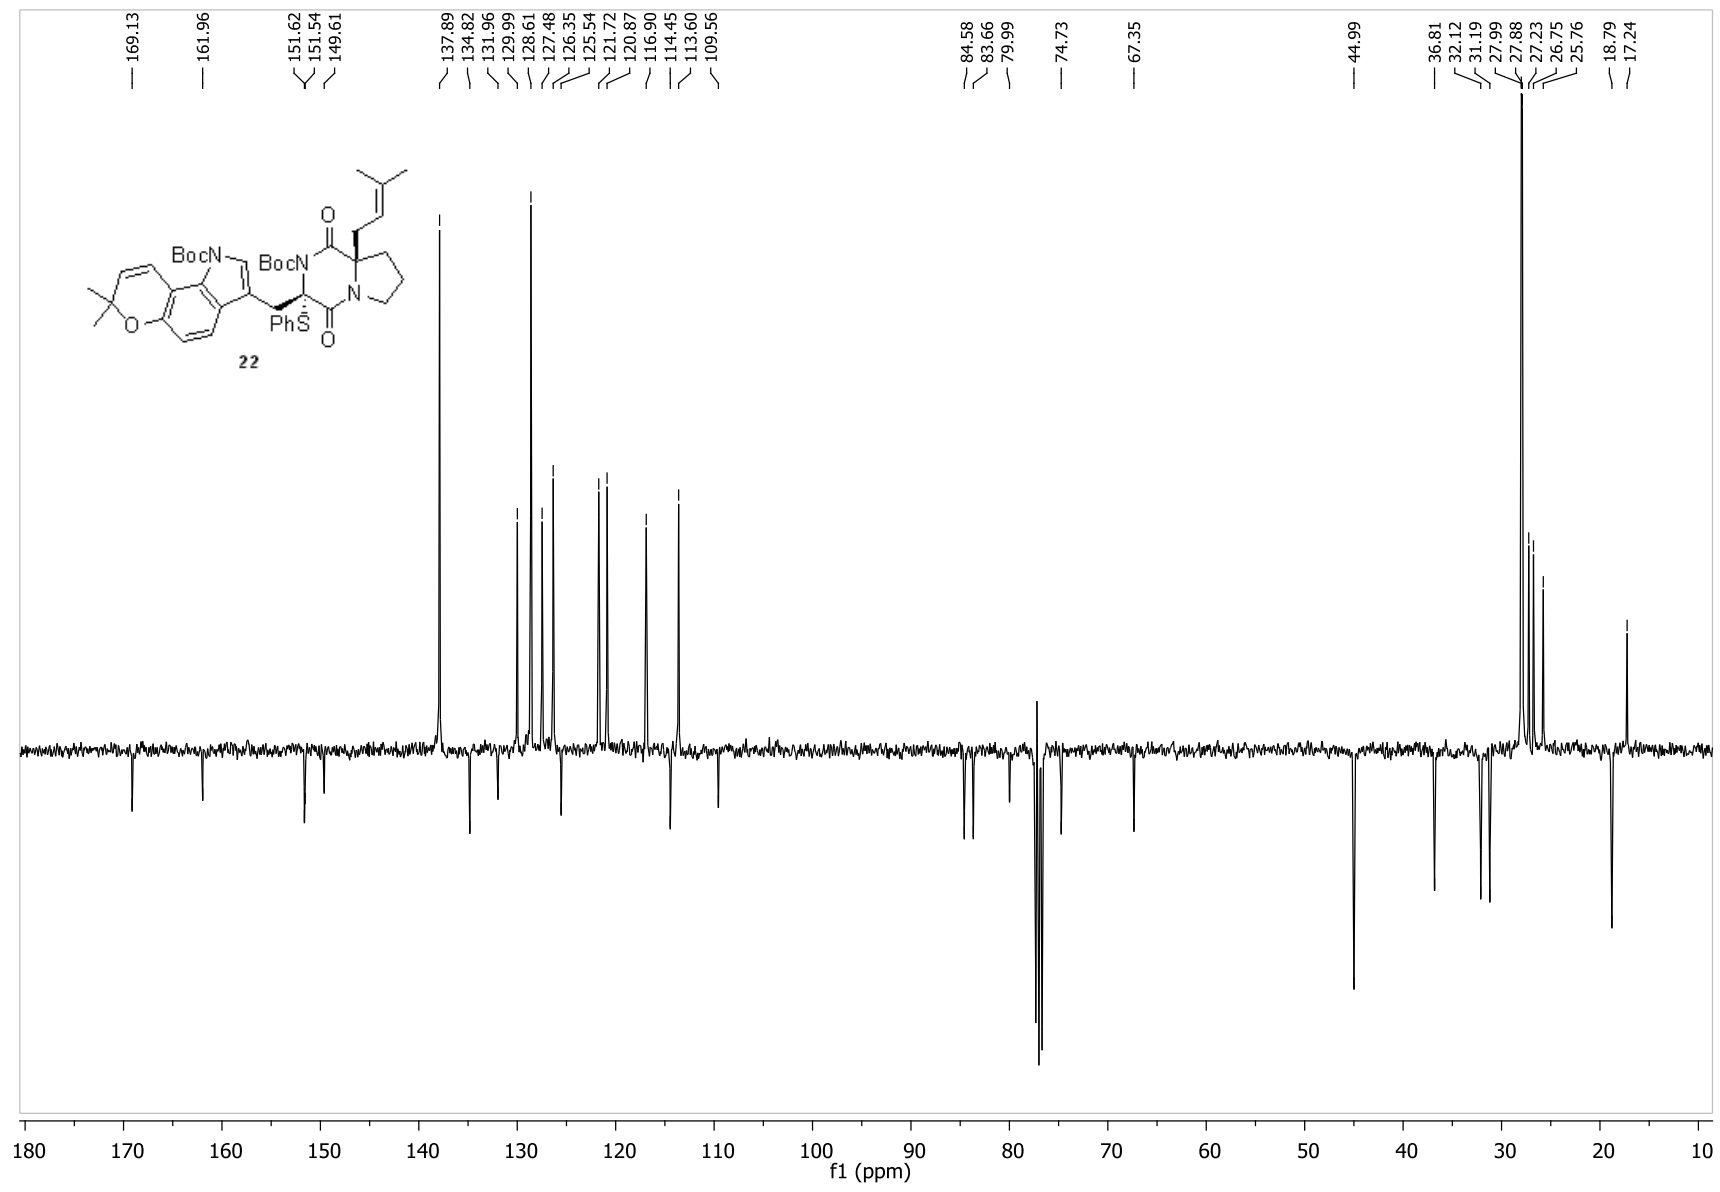

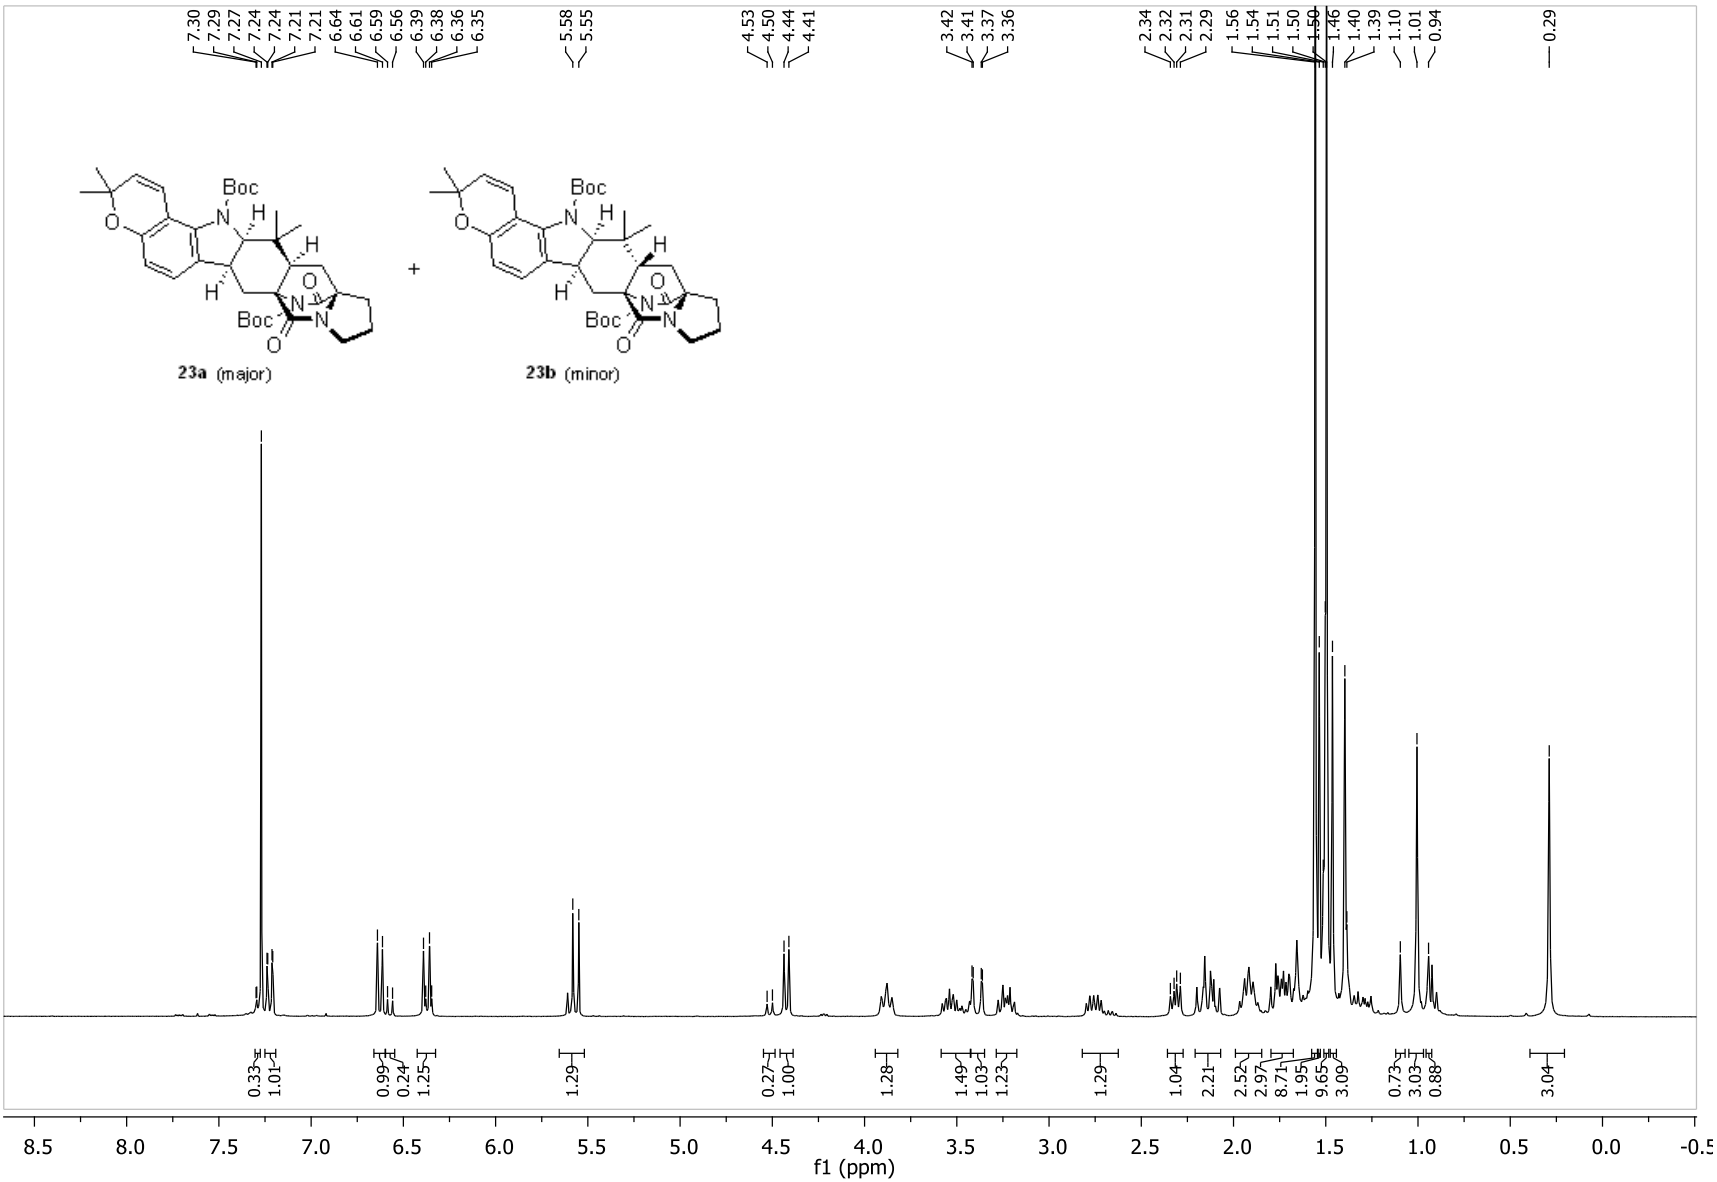

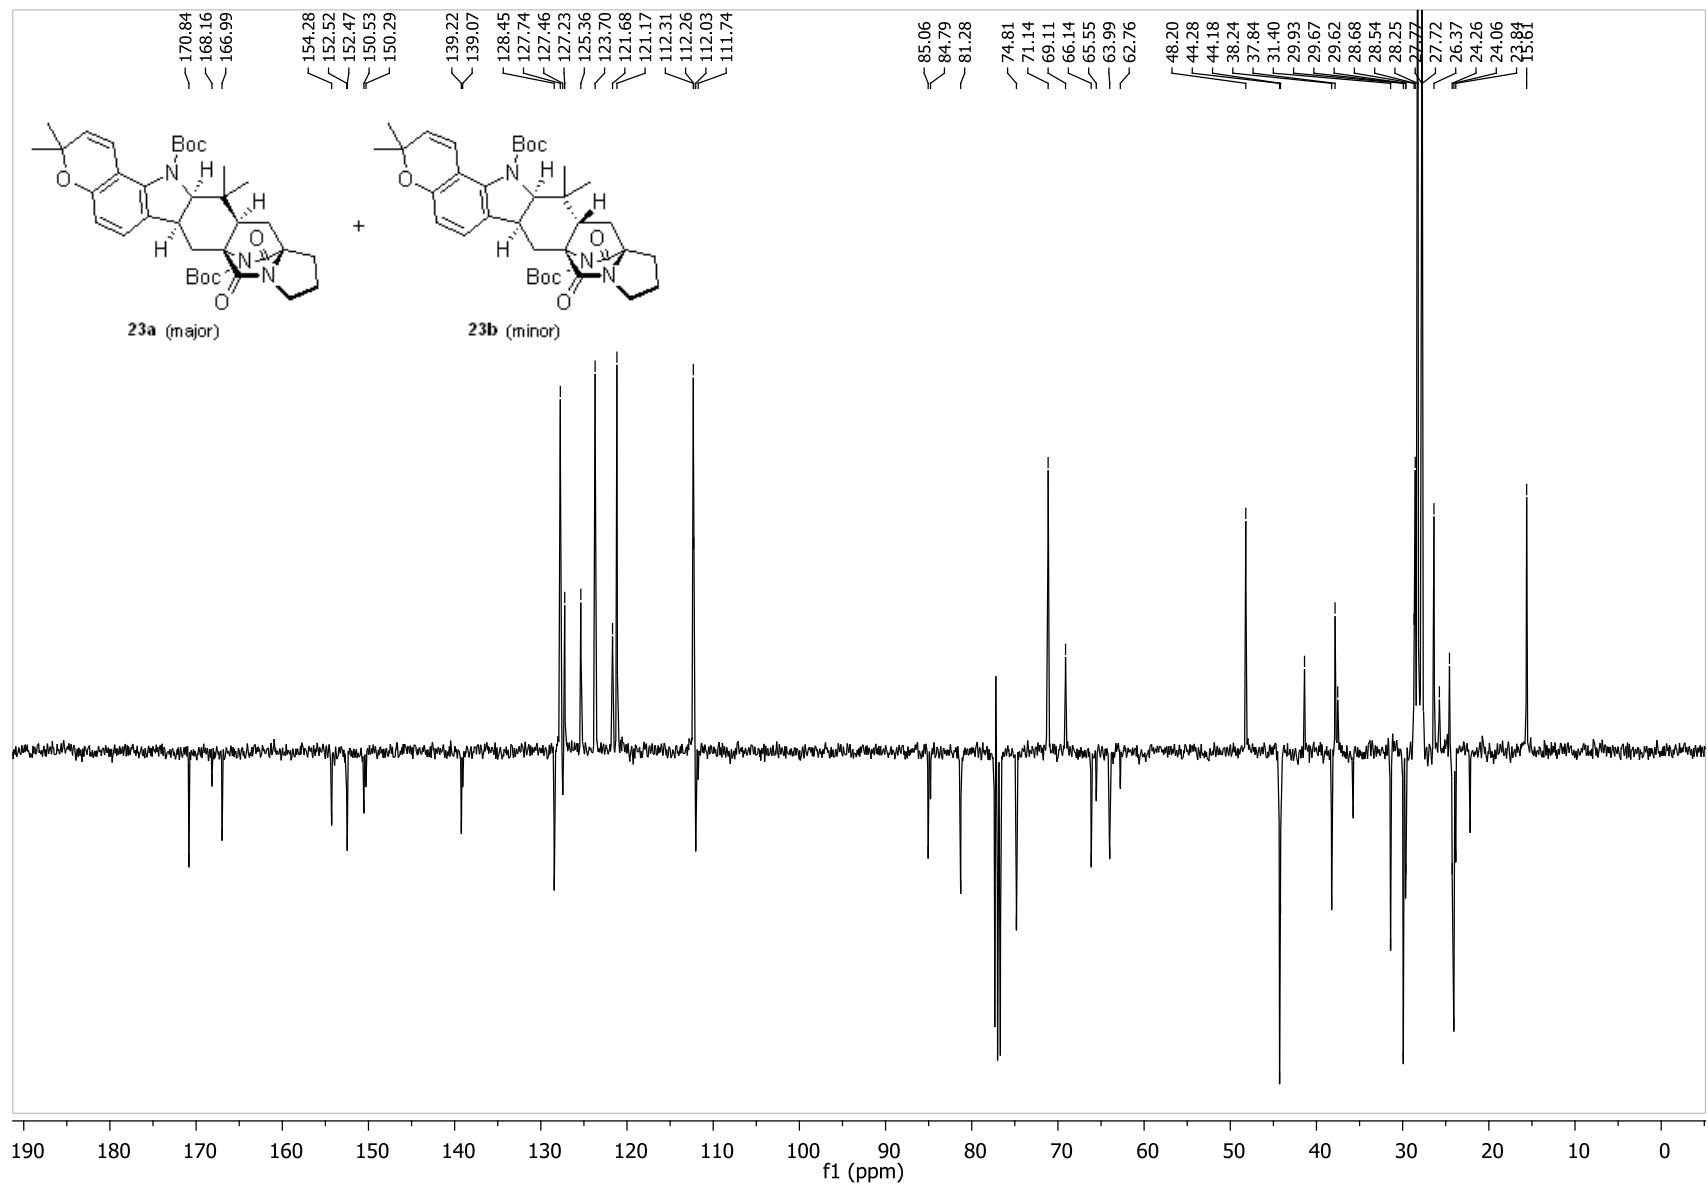

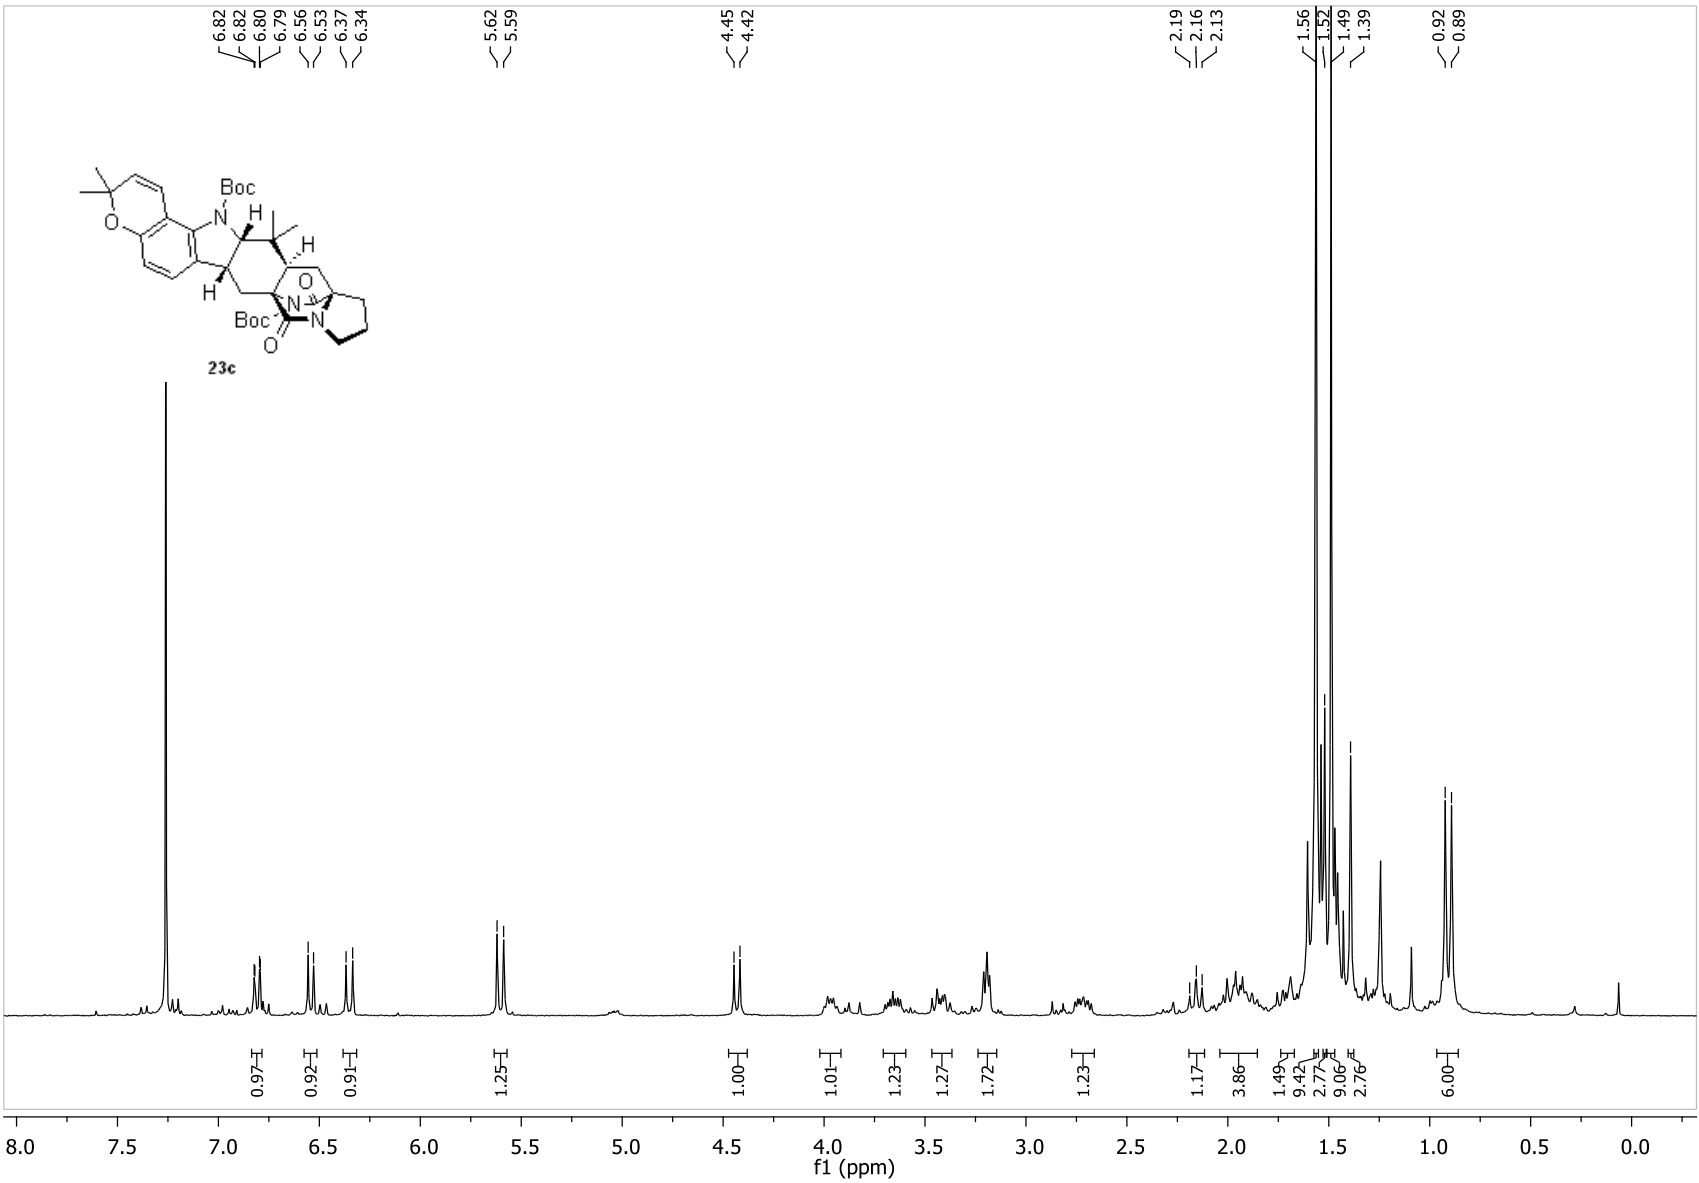



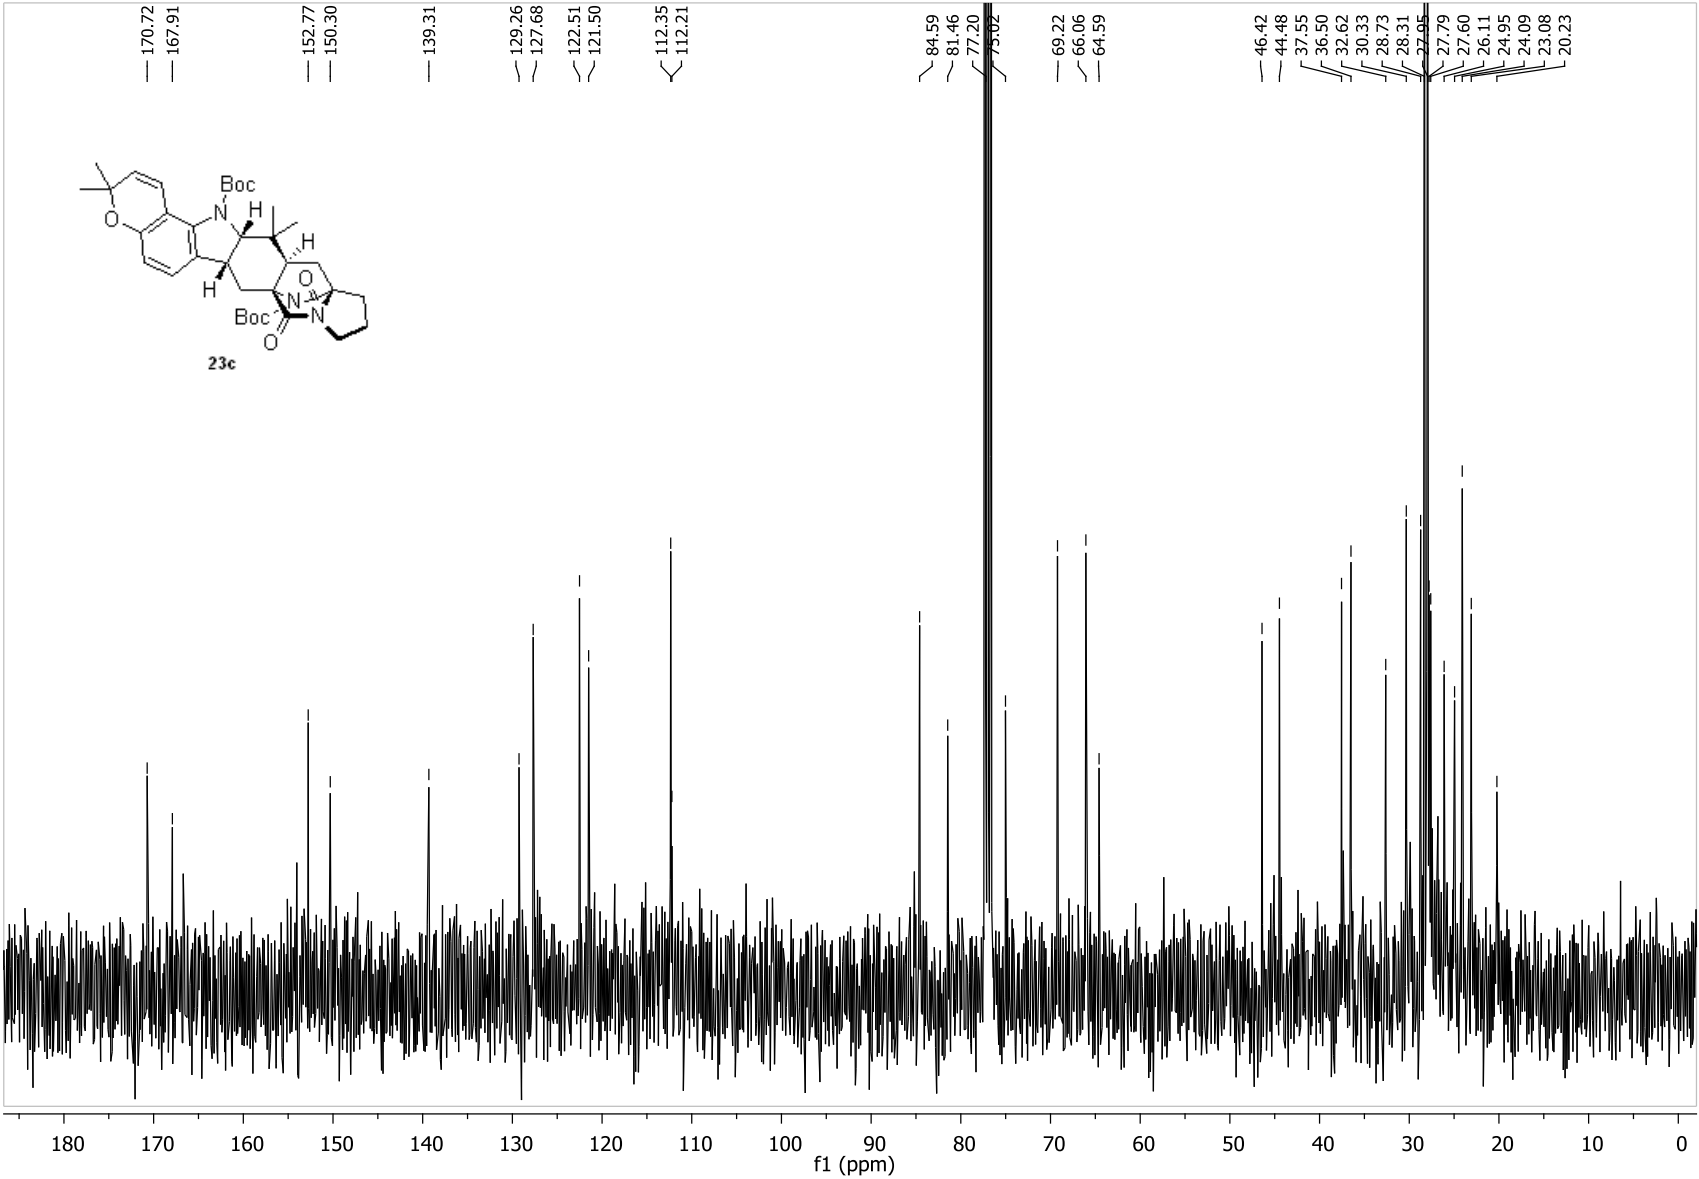

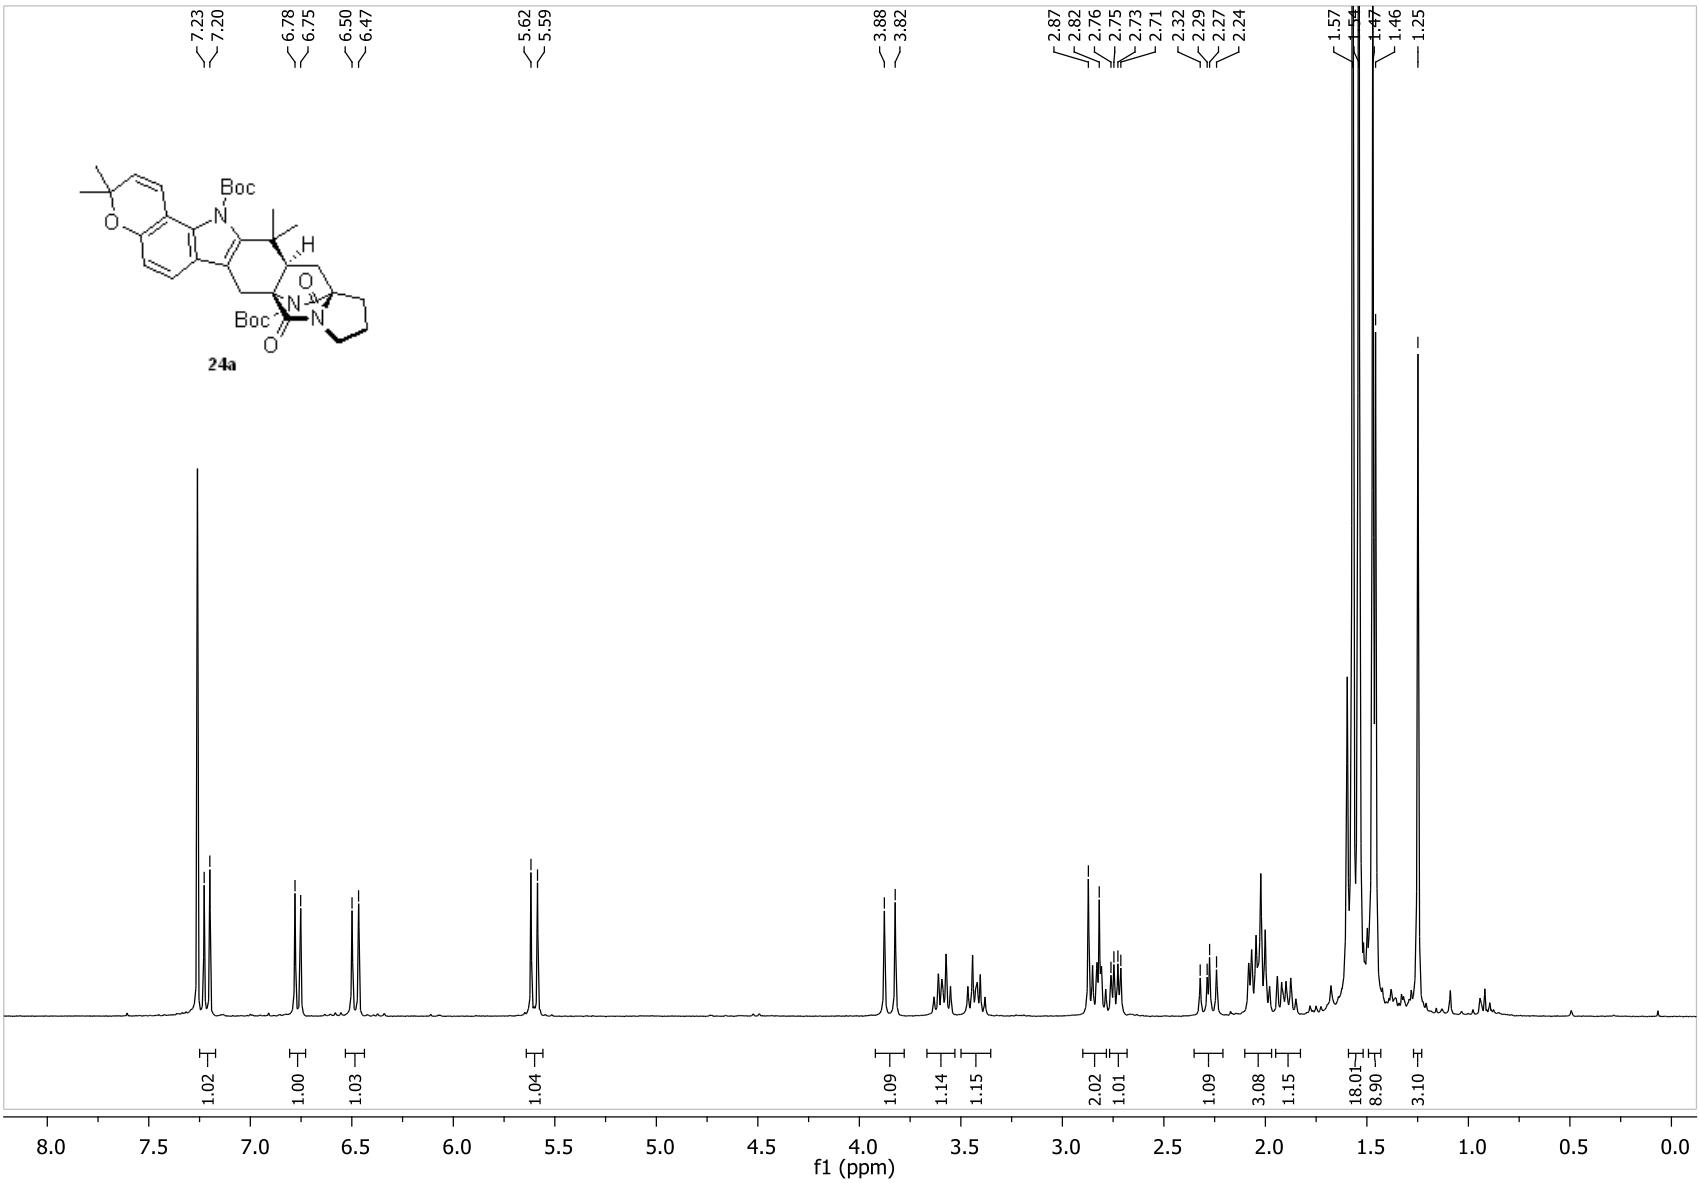

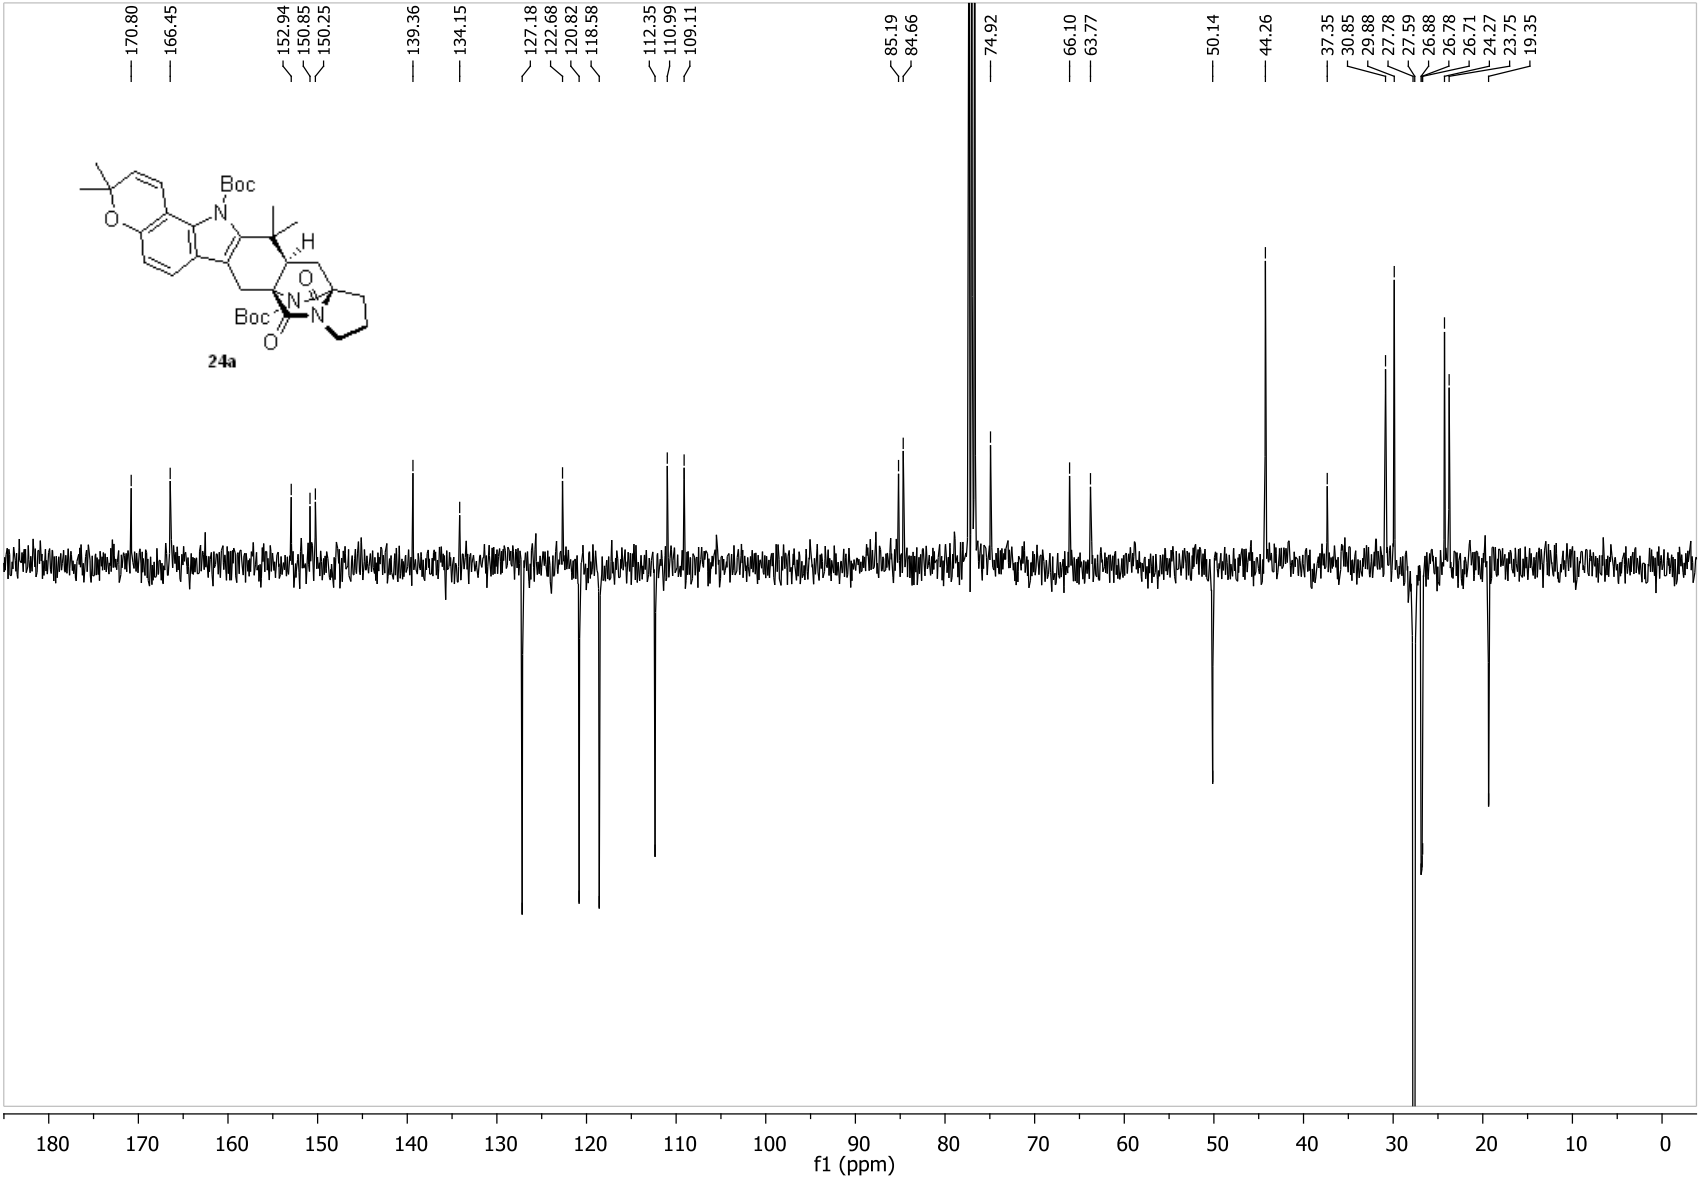

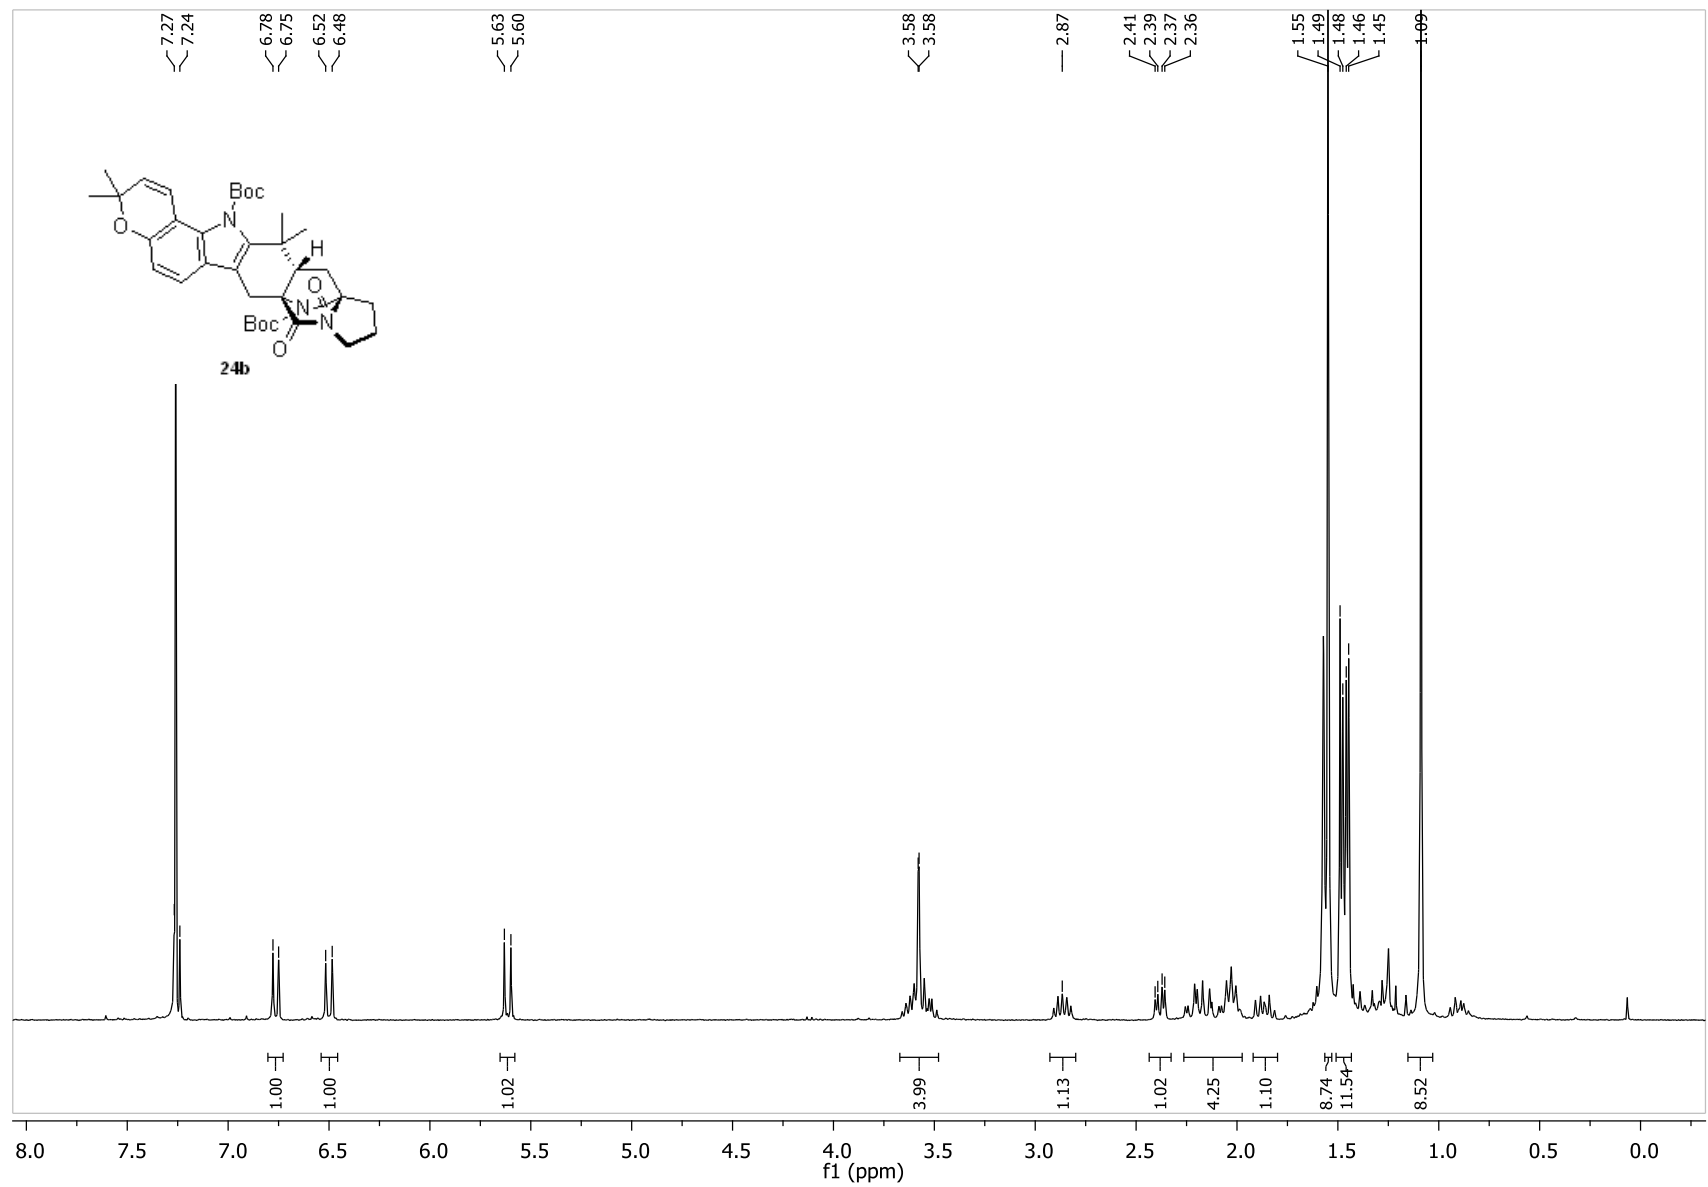

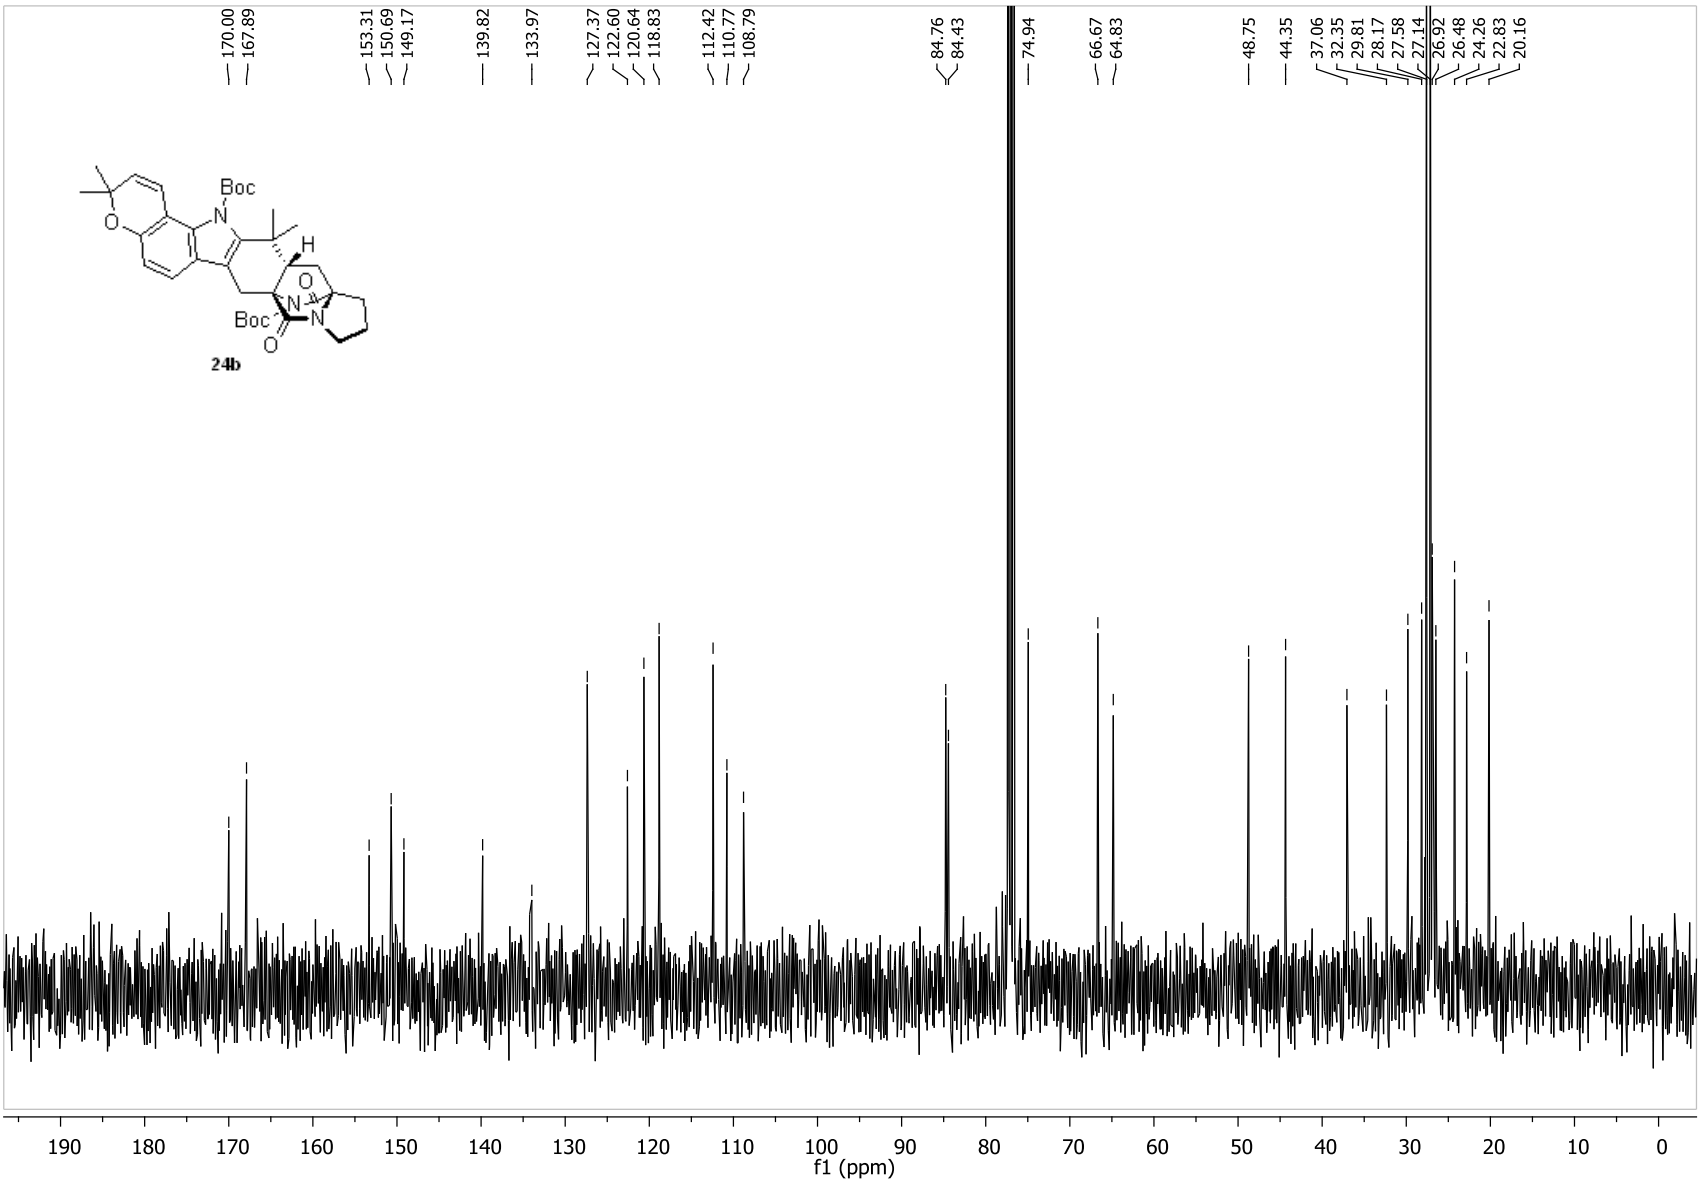

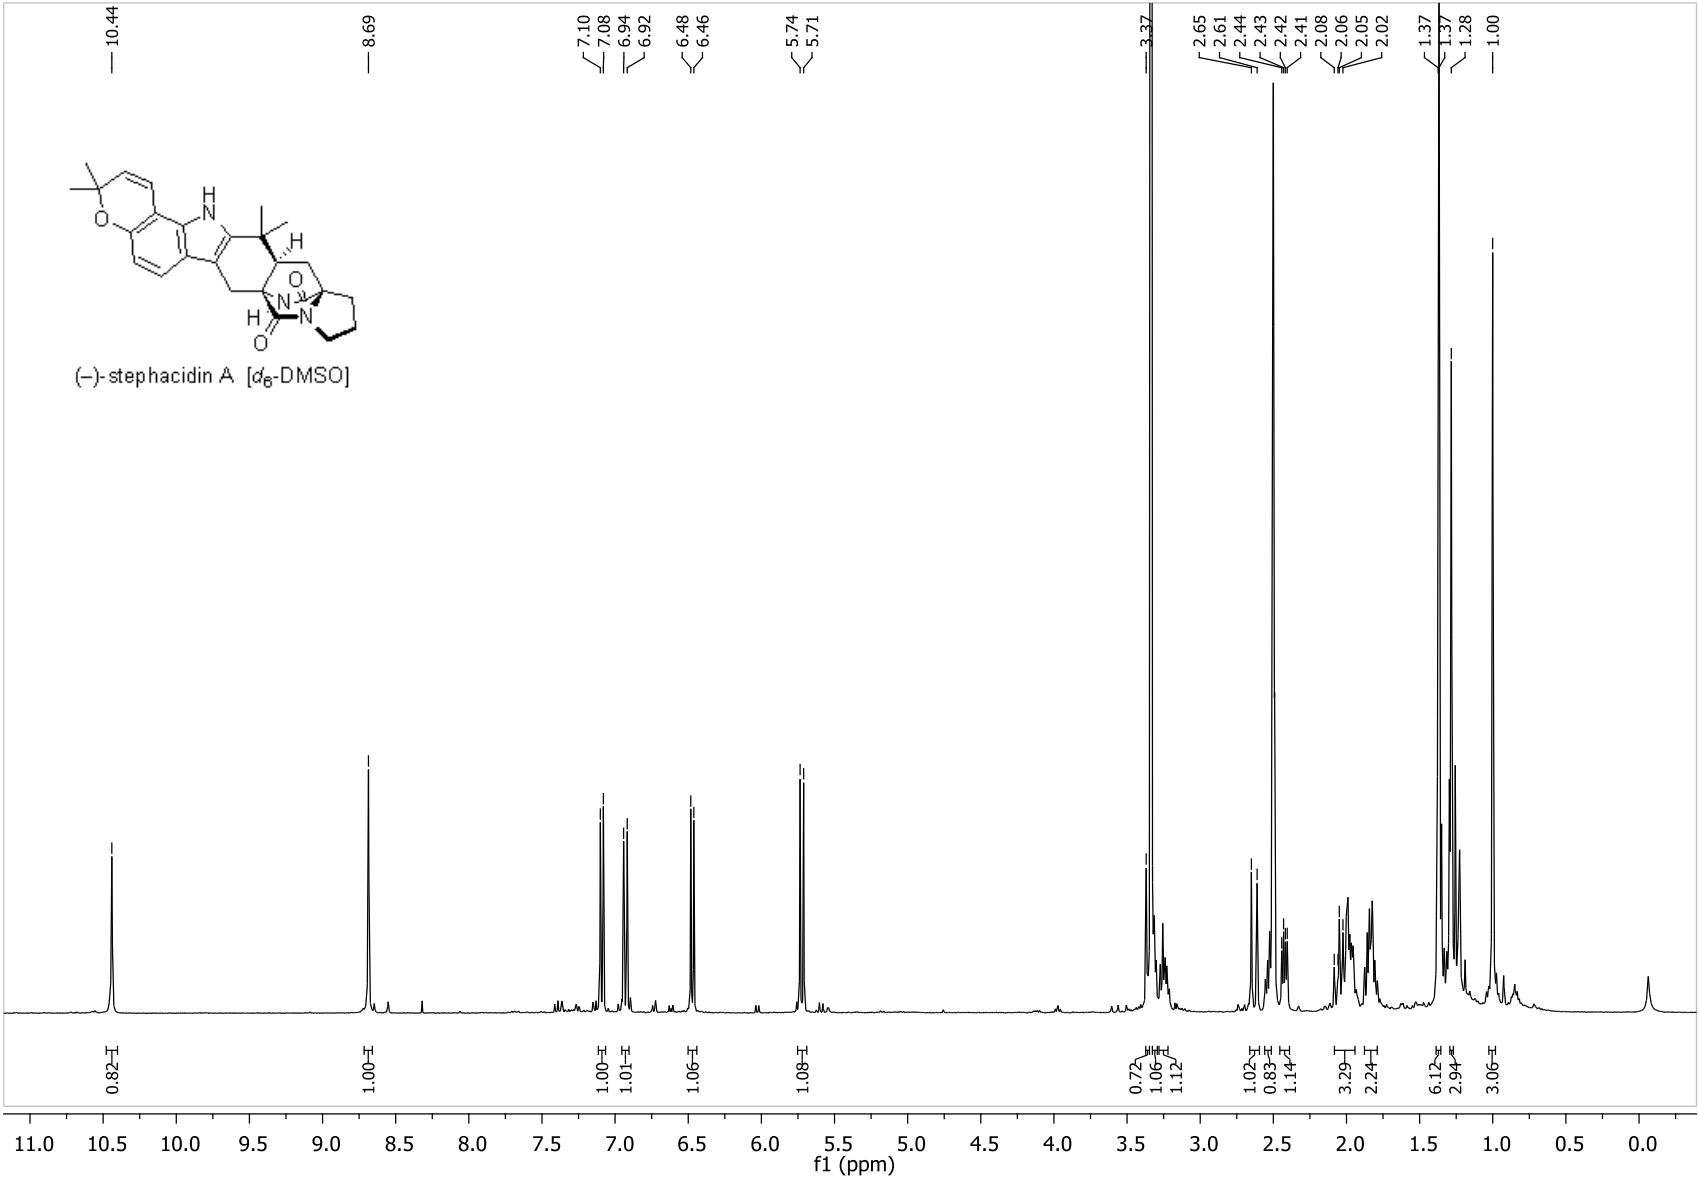

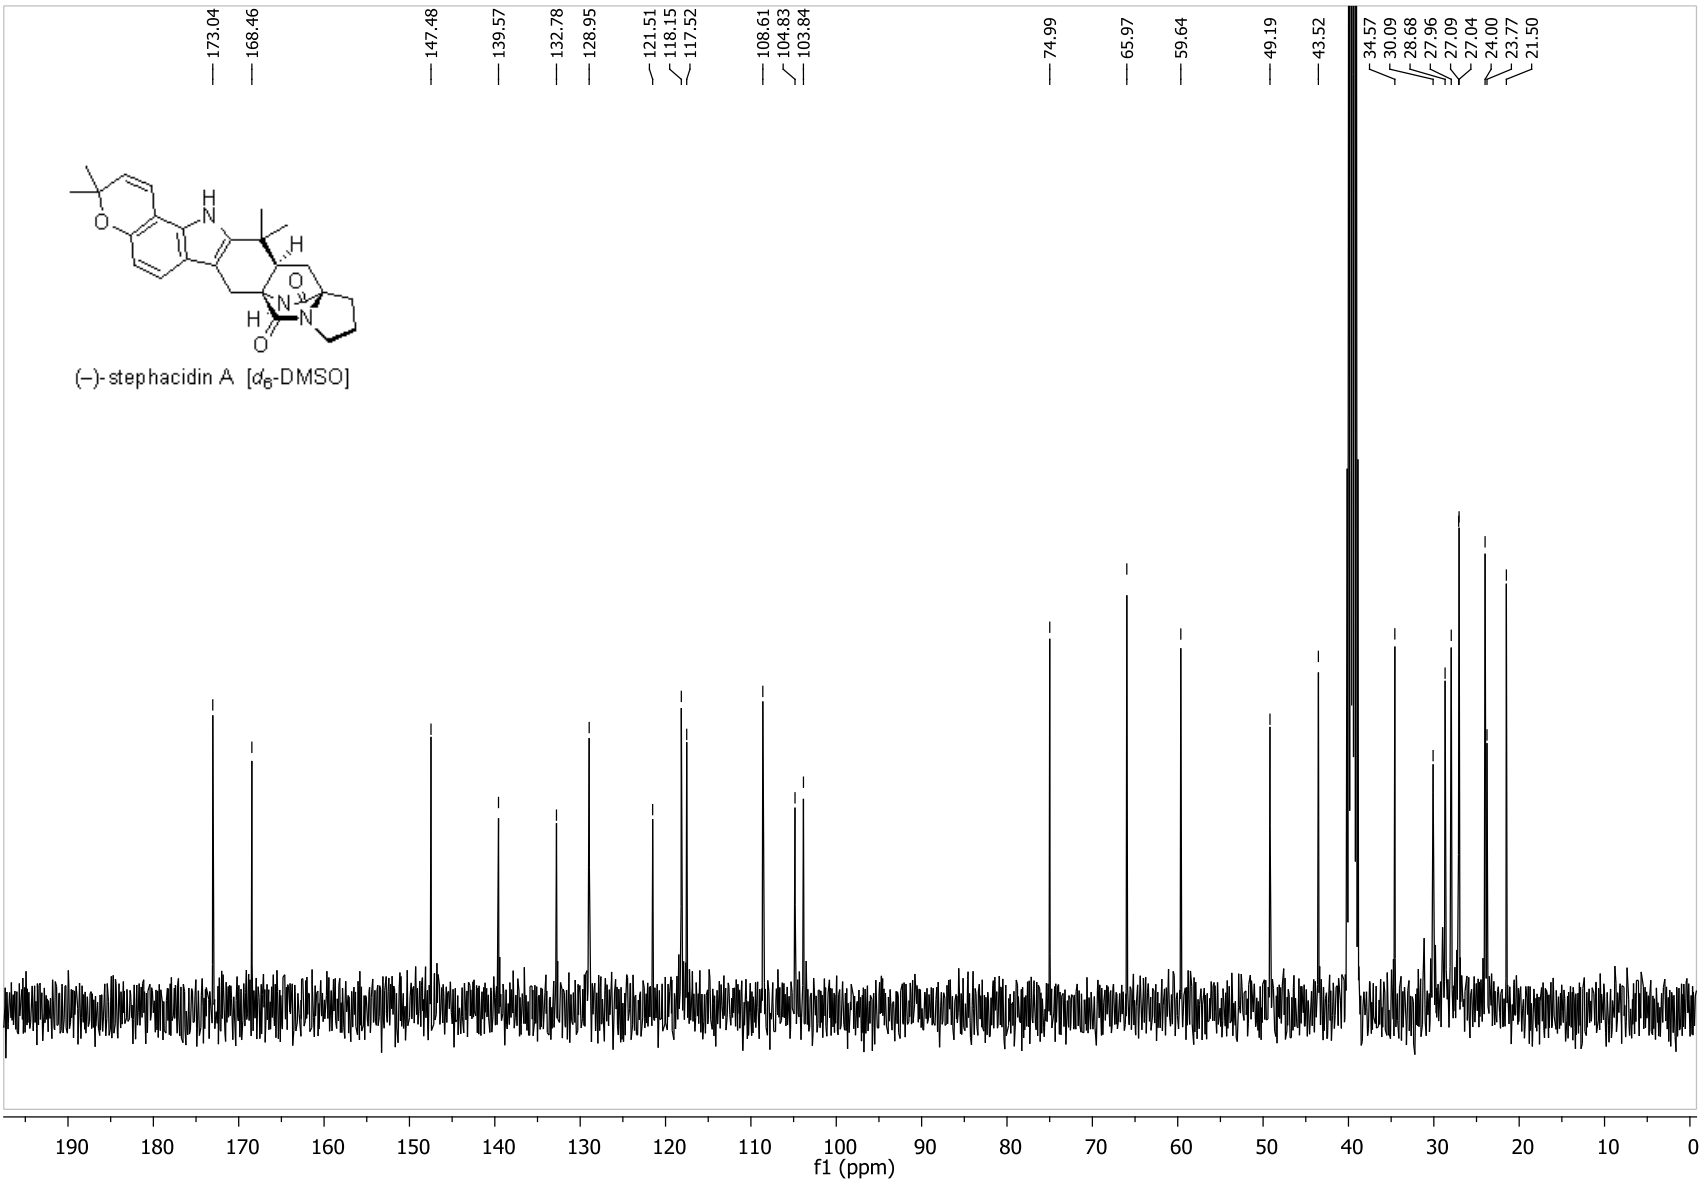

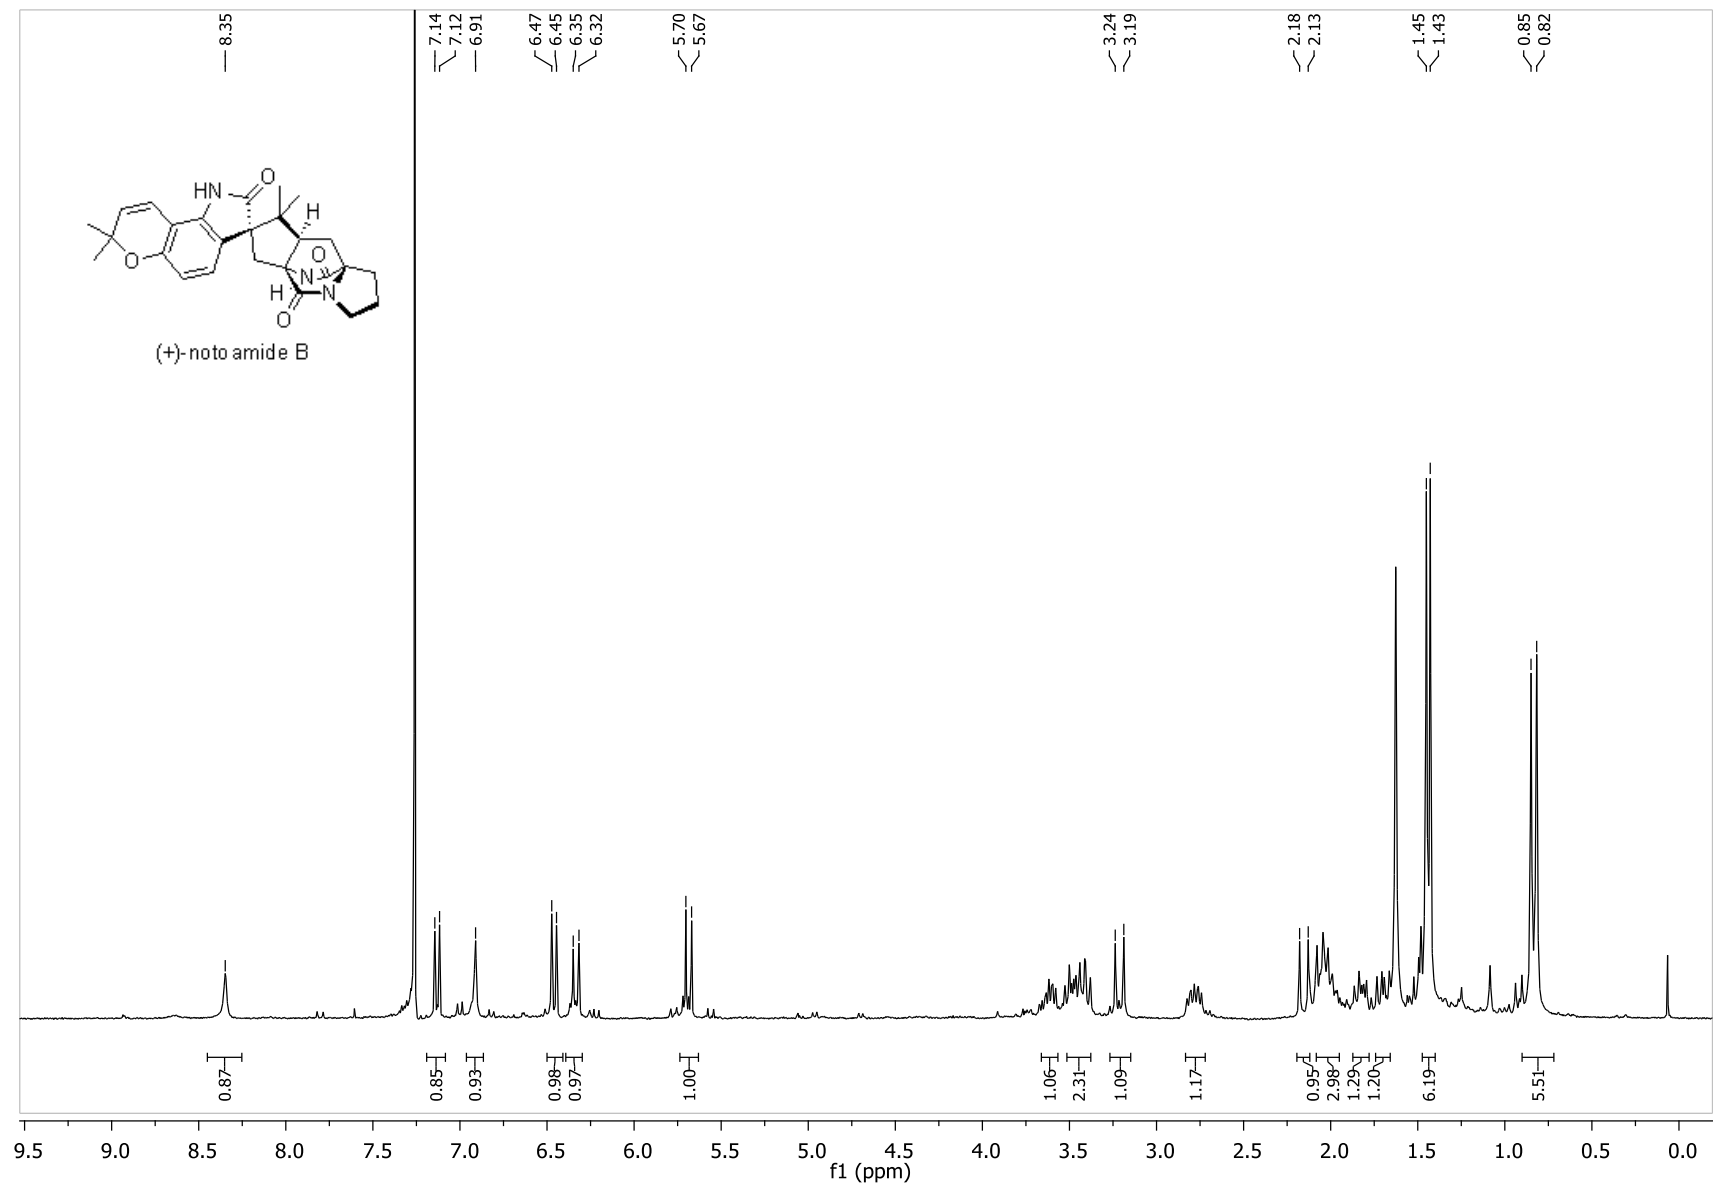



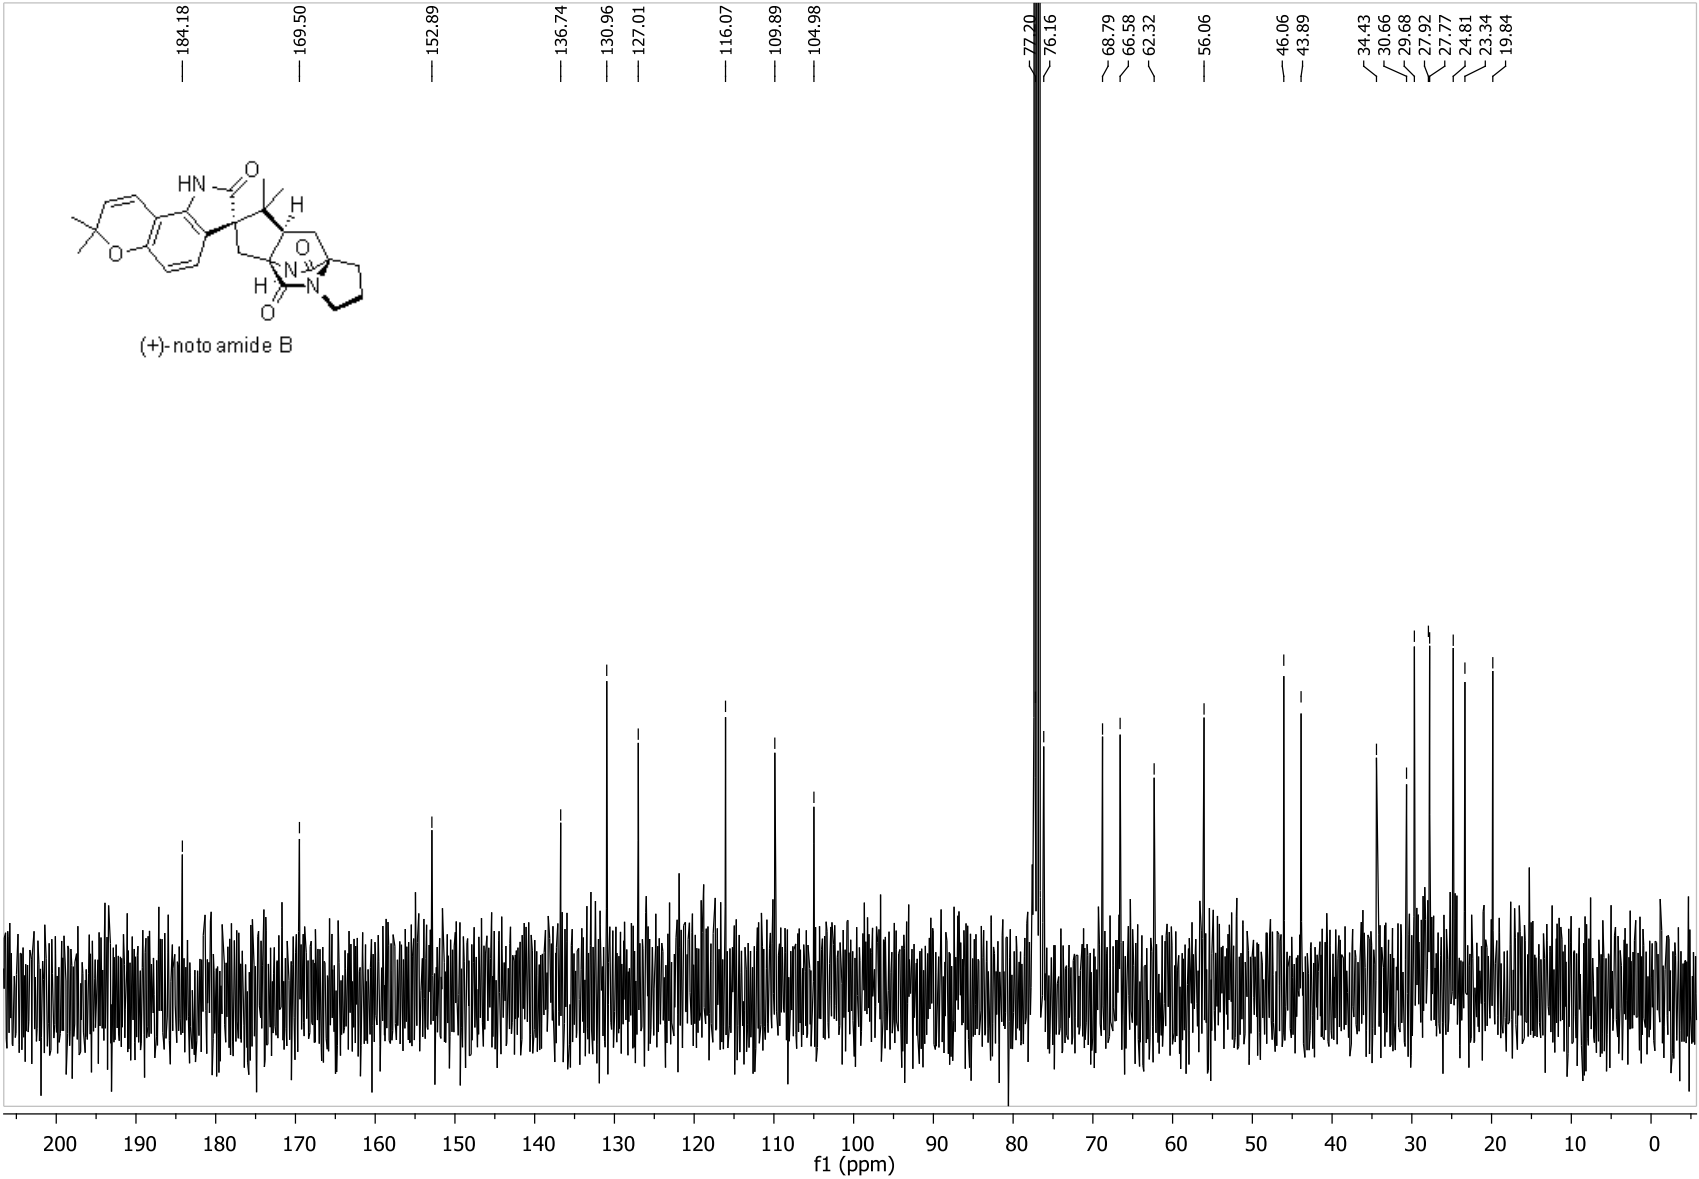

Supplement: c3ob40979a.pdf [file c3ob40979a.pdf]
